1 **Identification of a SARS-CoV-2 host metalloproteinase-dependent entry pathway differentially used**  
2 **by SARS-CoV-2 and variants of concern Alpha, Delta, and Omicron**

3 Mehdi Benlarbi<sup>1,2,3\*</sup>, Geneviève Laroche<sup>1,2,3\*</sup>, Corby Fink<sup>4,5</sup>, Kathy Fu<sup>1,2,3</sup>, Rory P. Mulloy<sup>1,2,3</sup>, Alexandra  
4 Phan<sup>1,2,3</sup>, Ardeshir Ariana<sup>1,2,3</sup>, Corina M. Stewart<sup>1,2,3</sup>, Jérémie Prévost<sup>6,7</sup>, Guillaume Beaudoin-Bussièrès<sup>6,7</sup>,  
5 Redaet Daniel<sup>1,2,3</sup>, Yuxia Bo<sup>1,2,3</sup>, Julien Yockell-Lelièvre<sup>1,2,8,9</sup>, William L. Stanford<sup>1,2,8,9</sup>, Patrick M. Giguère<sup>1</sup>,  
6 Samira Mubareka<sup>10,11</sup>, Andrés Finzi<sup>6,7</sup>, Gregory A. Dekaban<sup>4,5</sup>, Jimmy D. Dikeakos<sup>4,5</sup>, and Marceline  
7 Côté<sup>1,2,3@</sup>

8 <sup>1</sup> Department of Biochemistry, Microbiology and Immunology, University of Ottawa, Ottawa, Ontario,  
9 Canada

10 <sup>2</sup> Ottawa Institute of Systems Biology, University of Ottawa, Ottawa, Ontario, Canada

11 <sup>3</sup> Centre for Infection, Immunity, and Inflammation, University of Ottawa, Ottawa, Ontario, Canada

12 <sup>4</sup> Department of Microbiology & Immunology, Schulich School of Medicine & Dentistry  
13 Western University, London, Ontario, Canada.

14 <sup>5</sup> Molecular Medicine Research Laboratories, Robarts Research Institute, University of Western Ontario,  
15 London, Ontario, Canada

16 <sup>6</sup> Centre de Recherche du CHUM, Montréal, Québec, Canada

17 <sup>7</sup> Département de Microbiologie, Infectiologie et Immunologie, Université de Montréal, Montréal,  
18 Québec, Canada

19 <sup>8</sup> The Ottawa Hospital Research Institute, Ottawa, Ontario, Canada

20 <sup>9</sup> Department of Cellular and Molecular Medicine, University of Ottawa, Ottawa, Ontario, Canada

21 <sup>10</sup> Sunnybrook Research Institute, Toronto, Ontario, Canada

22 <sup>11</sup> Department of Laboratory Medicine and Pathobiology, University of Toronto, Toronto, Ontario,  
23 Canada

24 \*Contributed equally to this work

25 @ To whom correspondence should be addressed

26 E-mail: marceline.cote@uottawa.ca (MC)

27

28 **ABSTRACT**

29 To infect cells, severe acute respiratory syndrome coronavirus-2 (SARS-CoV-2) binds to angiotensin  
30 converting enzyme 2 (ACE2) via its spike glycoprotein (S), delivering its genome upon S-mediated  
31 membrane fusion. SARS-CoV-2 uses two distinct entry pathways: 1) a surface, serine protease-dependent  
32 or 2) an endosomal, cysteine protease-dependent pathway. In investigating serine protease-independent  
33 cell-cell fusion, we found that the matrix metalloproteinases (MMPs), MMP2/9, can activate SARS-CoV-2  
34 S fusion activity, but not that of SARS-CoV-1. Importantly, metalloproteinase activation of SARS-CoV-2 S  
35 represents a third entry pathway in cells expressing high MMP levels. This route of entry required cleavage  
36 at the S1/S2 junction in viral producer cells and differential processing of variants of concern S dictated its  
37 usage. In addition, metalloproteinase inhibitors reduced replicative Alpha infection and abrogated  
38 syncytia formation. Finally, we found that the Omicron S exhibit reduced metalloproteinase-dependent  
39 fusion and viral entry. Taken together, we identified a MMP2/9-dependent mode of activation of SARS-  
40 CoV-2 S. As MMP2/9 are released during inflammation and severe COVID-19, they may play important  
41 roles in SARS-CoV-2 S-mediated cytopathic effects, tropism, and disease outcome.

42

43 **KEY WORDS**

44 membrane fusion/ metalloproteinases/ SARS-CoV-2/ Spike glycoprotein/ variants of concern / viral entry

45

46

47

48

49

## 50 INTRODUCTION

51 Coronavirus disease-2019 (COVID-19) is caused by severe acute respiratory syndrome  
52 coronavirus-2 (SARS-CoV-2), a highly transmissible positive sense single-stranded RNA virus. The clinical  
53 presentation of COVID-19 ranges from asymptomatic or mild to severe disease, including pneumonitis  
54 and acute respiratory distress syndrome [1]. Severe COVID-19 is characterized by an uncontrolled release  
55 of cytokines, leading to hyperinflammation, tissue damage and dysregulated immune responses.  
56 Persistence of these responses often results in multi-organ damage and failure [2]. In addition, upon SARS-  
57 CoV-2 infection, pneumocyte syncytia formation is more prevalent in COVID-19 patients with severe  
58 chronic respiratory diseases, suggesting a potential hallmark of disease pathogenesis [3].

59 Membrane fusion is mediated by viral fusion proteins that protrude from the viral membrane or  
60 are exposed at the cell surface of infected cells. It can occur during viral entry, or between adjacent cells  
61 expressing viral fusion proteins and/or its receptor, causing syncytium formation. To catalyze the merging  
62 of membranes during viral entry and cell-to-cell fusion, viral fusion proteins undergo extensive  
63 conformational changes, from a high energy metastable state to a highly stable low energy state [4]. This  
64 conformational rearrangement is induced by virus specific triggers such as receptor binding, low pH,  
65 and/or proteolytic cleavage [4]. For SARS-CoV-2, the viral fusion protein is the spike glycoprotein (S). S is  
66 composed of two subunits: S1, which mediates attachment to the host cell receptor angiotensin-  
67 converting enzyme 2 (ACE2) and, S2, which facilitates membrane fusion [5]. SARS-CoV-2 and SARS-CoV-1  
68 are related pathogenic betacoronaviruses that share a common host receptor, ACE2, and both require a  
69 two-step sequential cellular protease cleavage of the S protein at the S1/S2 junction and at a S2' site for  
70 entry (Fig.1A) [6]. Cleavage of the S1/S2 junction reveals the S2' site, which is further processed to expose  
71 the fusion peptide allowing membrane fusion. However, unlike that of SARS-CoV-1, SARS-CoV-2 S possess  
72 an arginine-rich motif within the S1/S2 cleavage site enabling recognition and cleavage at the S1/S2  
73 boundary by furin or furin-like enzymes in the virus-producer cell [7]. The furin cleavage site has been

74 shown to be critical for SARS-CoV-2 infection in human lung cells and transmissibility in ferrets [8, 9].  
75 Moreover, variants of concerns such as Alpha, Delta and more recently Omicron possess mutations within  
76 the S1/S2 furin cleavage site that affect furin cleavage efficiency and S fusogenic activity [10-12].

77 Previous studies have defined two possible routes of entry used by SARS-CoV-2 and SARS-CoV-1:  
78 an early cell surface pathway following activation by serine proteases, notably the transmembrane serine  
79 protease 2 (TMPRSS2), and a late endocytic pathway using endolysosomal cathepsins [13]. Host cell  
80 protease expression dictates which viral entry pathways are preferred and could explain why some drugs  
81 targeting one but not both pathways are not effective at reducing SARS-CoV-2 burden in patients [14]. S  
82 glycoproteins expressed at the surface of infected cells also require similar triggers to induce syncytia  
83 formation [15]. Interestingly, previous studies have reported SARS-CoV-2 S-mediated cell-cell fusion in the  
84 absence of serine protease expression [16, 17], however the identification of the non-serine protease(s)  
85 or if this mechanism represents an additional cell entry pathway remain unknown.

86 Here we show that in the absence of membrane-bound serine proteases, SARS-CoV-2 S uses the  
87 matrix metalloproteinases (MMPs), MMP2/9, to induce cell-cell fusion. In cells expressing high levels of  
88 MMP2/9 such as HT1080 cells, infection and syncytia formation induced by replicative Alpha were  
89 significantly reduced by MMP inhibitors. We also investigated MMP roles in viral entry using lentiviral  
90 pseudotypes and virus-like particles harbouring S of wild-type D614G or variants of concern and found  
91 that the various S glycoproteins differentially used the MMP pathway and preferential usage correlated  
92 with the extent of S1/S2 processing and syncytia formation. MMPs form a large family of zinc-dependent  
93 endopeptidases, most of which, such as MMP2 and MMP9, are secreted [18]. Dysregulation of MMPs  
94 have been linked to various human diseases, including cancer, neuronal disorders, and COVID-19 [19-21].  
95 As such, Gelzo, M., et al., reported increased serum levels of MMP3 and MMP9 in severe COVID-19  
96 patients, which also positively correlated with serum interleukin-6 and circulating neutrophils and  
97 monocytes [22]. Therefore, in the context of hyperinflammation and dysregulated immune responses,

98 MMPs could play a role in facilitating SARS-CoV-2 viral entry and syncytia formation, expanding tropism  
99 to serine protease negative cells, and exacerbating COVID-19. Thus, targeting MMPs, serine proteases,  
100 and cathepsins may be useful to reduce SARS-CoV-2 infection and COVID-19 severity.

## 101 RESULTS

102 ***Cell-cell fusion mediated by SARS-CoV-2 S can occur in a serine-protease-independent manner but***  
103 ***remains ACE2 dependent and is enhanced by TMPRSS2 and TMPRSS13.***

104 To study the host factors required for SARS CoV-2 S activation and compare to host factors  
105 required for SARS-CoV-1 S, we first sought to establish a syncytium-formation assay. Parental 293T cells  
106 or 293T cells engineered to overexpress human ACE2 were transfected with plasmids encoding S and  
107 green fluorescent protein (GFP) to visualize large areas of fused cells that can be distinguishable from  
108 single cells. A plasmid encoding for the serine protease, TMPRSS2, or an empty vector, pCAGGS, were also  
109 transfected to assess S dependency on serine protease fusion activity. As expected, we found that SARS-  
110 CoV-1 S can only induce syncytia formation in the presence of both ACE2 and TMPRSS2 (Fig.1B) [6, 23]. In  
111 addition, the ACE2/TMPRSS2-dependent SARS-CoV-1 S cell fusion was abrogated when cells were treated  
112 with camostat, a serine protease inhibitor, further indicating that cell fusion by SARS-CoV-1 S requires  
113 serine protease activity (Fig.1B). In contrast, SARS CoV-2 S-mediated syncytia were observed even in the  
114 absence of TMPRSS2, yet their formation was still dependent on ACE2 expression (Fig.1B). Interestingly,  
115 incubation of cells with camostat did not reduce syncytia formation by SARS CoV-2 S, in the presence or  
116 absence of TMPRSS2 (Fig.1B). These results suggest that, unlike SARS-CoV-1 S, SARS CoV-2 S-mediated  
117 fusion can occur independently of serine protease activity.

118 ACE2 dependence and the contribution of TMPRSS2 were further assessed by incubating SARS-  
119 CoV-2 S-expressing 293T cells with soluble ACE2. In these conditions, an ACE2 dose-dependent increase  
120 in S-mediated fusion and a robust enhancement of cell-cell fusion when TMPRSS2 was co-expressed was

121 observed (Fig.1B, S1). To further quantify cell-cell fusion, we used a bimolecular fluorescence  
122 complementation assay based on the separate expression of fragments of the yellow fluorescent protein,  
123 Venus, fused to a leucine zipper in effector and target cell populations (ZIP Venus assay) (Fig. 1C) [24]. This  
124 assay allows for a quantitative measurement of the extent of cell-cell fusion using fluorescence. Previous  
125 studies on SARS-CoV-1 S and recent studies on SARS CoV-2 S revealed that other serine proteases, such  
126 as TMPRSS4 and TMPRSS13, can also activate these viral fusion proteins [25-29]. Here we sought to  
127 validate a role for TMPRSS13 in our assay given its broad expression in the respiratory tract and by immune  
128 cells, in addition to its previously reported implications in infection [30]. Target cells transfected with  
129 various combinations of plasmids encoding ACE2 and ones encoding TMPRSS2 or TMPRSS13 were co-  
130 cultured with effector cells encoding S from SARS-CoV-1 or SARS CoV-2. We found that expression of  
131 TMPRSS2 or TMPRSS13 enhanced SARS-CoV-1 and SARS-CoV-2 S mediated cell-cell fusion in an ACE2-  
132 dependent manner and that the contribution of TMPRSS2/13 in cell-cell fusion was sensitive to camostat  
133 treatment (Fig. 1C). Like the results of the syncytia formation assay, cell-cell fusion was observed in a  
134 serine protease-independent manner for SARS-CoV-2 S but not SARS-CoV-1 (Fig. 1C). These results agree  
135 with previous studies and indicate that the fusion activity of SARS CoV-1 and SARS-CoV-2 S can be  
136 activated by several serine proteases, yet only SARS-CoV-2 can induce cell-cell fusion in a serine protease-  
137 independent manner.

138 ***SARS-CoV-2 S2' site is processed by both serine proteases and metalloproteinases, and cell-cell fusion***  
139 ***is abrogated by metalloproteinase inhibitors***

140 Previous studies on coronavirus S glycoproteins showed that activation of the fusion activity of S  
141 required sequential proteolytic cleavage at the S1/S2 boundary and at a S2' site, both of which can be  
142 performed by several different serine proteases or endosomal cathepsin proteases during viral entry [31,  
143 32]. To confirm that these protease cleavage steps are also required for the serine protease-independent  
144 fusion observed with SARS-CoV-2 S, we next tested the fusion activity of S constructs mutated at the S1/S2

145 junction ( $\Delta$  furin site) and the S2' site (R815A) (Fig. 1A). We found that SARS-CoV-2 S-mediated syncytia  
146 formation still occurred when the furin cleavage site was removed, but only in the presence of TMPRSS2  
147 (Fig.1D). In addition, and similar to reports from other studies, a mutation at the S2' site inactivated the  
148 fusion activity of S, which could not be rescued by TMPRSS2 expression (Fig.1D) [17, 33]. These results  
149 indicate that the S2' site of SARS CoV-2 S is critical for fusion activation and that the serine protease-  
150 independent fusion requires processing at the S1/S2 boundary.

151 The requirement for an intact S2' site also suggested that serine protease independent fusion  
152 required proteolysis by an unknown protease. To identify the unknown protease(s) responsible for the  
153 fusion, we used the cell-cell fusion assay and incubated the cells with inhibitors of serine proteases  
154 (camostat), late endosome/lysosomal cysteine proteases (E64d), and metalloproteinases (GI 254023X  
155 (GIX), TAPI-2, and batimastat). As expected, camostat and E64d, did not affect SARS-CoV-2 S-mediated  
156 cell-cell fusion in the absence of TMPRSS2. However, all the metalloproteinase inhibitors completely  
157 blocked fusion (Fig.1E) suggesting that one or multiple metalloproteinases expressed by 293T-ACE2 cells  
158 can trigger SARS-CoV-2 S fusion activity. In addition, these metalloproteinase inhibitors were rendered  
159 ineffective when TMPRSS2 was expressed (Fig.1E), suggesting that TMPRSS2 could compensate for an  
160 inhibition of metalloproteinase activity. However, metalloproteinase-dependent fusion was still observed  
161 in 293T-TMPRSS2/ACE2 cells treated with camostat (Fig. 1D,E). To explore this further, we co-cultured  
162 293T cells expressing SARS-CoV-2 S and GFP with Calu-3 cells which endogenously express ACE2 and serine  
163 proteases such as TMPRSS2 [34]. We found that SARS-CoV-2 S efficiently promoted cell-cell fusion which  
164 was insensitive to the action of single inhibitors and could only be blocked when a combination of serine  
165 protease and metalloproteinase inhibitors were used (Fig.1F). These results indicate that serine proteases  
166 and metalloproteinases perform a redundant cleavage step, presumably at the S2' site.

167 ***SARS-CoV-2 S can mediate cell entry via three distinct routes, including a metalloproteinase-***  
168 ***dependent pathway.***

169 Previous studies had also reported SARS-CoV-2 S batimastat-sensitive cell-cell fusion, yet this  
170 broad metalloproteinase inhibitor had no effect on viral entry in the cell lines tested [16, 17]. However,  
171 since our results show that metalloproteinases can activate S for cell-cell fusion, the expectation is that  
172 these proteases should also be able to mediate viral entry. To investigate this, we assayed viral entry in  
173 293T-ACE2 and Calu-3 cells using lentiviral pseudotypes. Like other studies [35], we found that SARS-CoV-  
174 2 and SARS-CoV-1 S-mediated entry was strongly inhibited by E64d in 293T-ACE2 cells, and by camostat  
175 in Calu-3 cells (Fig.2AB). In addition, a slight reduction in entry of SARS-CoV-2 pseudotypes in 293T-ACE2  
176 cells was observed in the presence of metalloproteinase inhibitors (Fig.2A). However, the dramatic  
177 decrease in entry after treatment with E64d indicated that the cathepsin entry pathway is the preferred  
178 route in these cells.

179 We surmised that while expression of metalloproteinases in 293T-ACE2 cells might be sufficient  
180 to induce cell-cell fusion, the levels could be too low to mediate effectively viral entry. We therefore  
181 measured metalloproteinase expression in 293T cells and various cell lines using quantitative reverse  
182 transcription PCR (RT-qPCR) (Fig.2C, data not shown). We found that HT1080 cells express high levels of  
183 MMP2 and MMP9, which are targets of GIX, TAPI-2 (Fig.2C) [36, 37]. The secretion and elevated activity  
184 of MMP2 and MMP9 produced by these cells were also confirmed by zymography (Fig.2D). To test a  
185 potential role of these proteases in SARS-CoV-2 entry, HT1080 cells were transfected with a plasmid  
186 encoding ACE2 and infected with SARS-CoV-2 lentiviral pseudotypes. Strikingly, in these cells, SARS-CoV-  
187 2 S-mediated entry was insensitive to E64d and camostat, but completely abrogated by TAPI-2 and GIX.  
188 In comparison, entry of pseudotypes bearing SARS-CoV-1 S was blocked by E64d and those with VSV-G  
189 remained mostly unaffected, although a slight inhibition by camostat was noted (Fig. 2E). These results  
190 indicate that in cells expressing high levels of secreted MMPs, SARS-CoV-2 S entry was mediated via a  
191 third, previously unrecognized entry route that is cysteine/serine protease-independent and  
192 metalloproteinase-dependent.



193 ***A viral-like-particle system reveals distinct S processing efficiencies and differential usage of the***  
194 ***metalloproteinase-dependent entry pathway among SARS-CoV-2 variants***

195 Although lentiviral pseudotypes are suitable, well-established surrogate systems to investigate  
196 viral entry, differential budding sites between lentiviruses and coronaviruses can lead to variations of S  
197 glycoprotein processing [38, 39]. Since our cell-cell fusion assays clearly demonstrated that processing of  
198 S at the S1/S2 junction is required for metalloproteinase-dependent activation of S, we sought to validate  
199 the lentiviral pseudotype system using virus-like particles (VLPs). As described previously, SARS-CoV-2  
200 VLPs are produced in cells after co-expression of the four SARS-CoV-2 structural proteins (S, M, E, N) and  
201 a reporter gene, thus more accurately recapitulating SARS-CoV-2 egress and entry compared to lentiviral  
202 pseudotypes [40]. We found that lentiviruses incorporate fully processed S (Fig.3A), while S on the VLPs  
203 were a mixture of unprocessed (S<sub>0</sub>) and cleaved S (Fig.3B), which is in agreement with previous studies  
204 [40-44]. Interestingly, highly transmissible variants of concern Alpha and Delta both have mutations at  
205 P681 near the S1/S2 furin cleavage site, however our results demonstrate differential S processing  
206 between these two variants [10, 45]. Specifically, the Delta variant S, which harbours a P681R mutation,  
207 is processed more efficiently than both the alpha variant S, which harbours a P681H mutation, and the  
208 D614G S (Fig.3B). This difference in processing efficiency was not discernible in the lentiviral pseudotype  
209 system (Fig.3A). In addition, we tested a previously described deletion mutant (del675-679), often  
210 generated during cell culture adaptation of SARS-CoV-2, abrogating the efficiency of S1/S2 processing  
211 while keeping the furin cleavage site intact (Fig. 1A) [46-48]. Surprisingly, even this mutant had enhanced  
212 processing when expressed on lentiviral pseudotypes compared to VLPs, further demonstrating  
213 differential S processing in both systems (Fig. 3A,B).

214 We next tested entry of SARS-CoV-2 VLPs in 293T-ACE2, Calu-3, and HT1080 cells stably expressing  
215 ACE2 (HT1080-ACE2). Similar to the lentiviral pseudotypes, we found that entry of VLPs harbouring S with  
216 the D614G mutation or del675-679, or those of Alpha and Delta was strongly inhibited by E64d in 293T-

217 ACE2, and by camostat in Calu-3 cells (Fig.3C,D). However, unlike lentiviral particles, D614G and Alpha VLP  
218 entry into HT1080-ACE2 were partially sensitive to E64d, GIX and TAPI-2, while Delta entry was insensitive  
219 to E64d and dramatically decreased by GIX and TAPI-2 (Fig.3E). This suggests that Delta S preferentially  
220 used the metalloproteinase-dependent pathway. In comparison, del675-679 S-mediated VLP entry was  
221 only sensitive to E64d. Given the broad specificity of GIX and TAPI-2, we also tested a specific  
222 MMP2/MMP9 inhibitor, MMP-2/-9 Inhibitor II, which phenocopied the broad-spectrum  
223 metalloproteinase inhibitors (Fig.3C,D) suggesting an important roles for MMP2 and MMP9 in this  
224 pathway. Taken together, these results confirm SARS-CoV-2 entry via a third metalloproteinase-  
225 dependent route that is enabled by S1/S2 processing.

#### 226 ***MMP2 and MMP9 knockdown reduces serine protease-independent syncytia formation***

227 The SARS-CoV-2 preferential metalloproteinase entry pathway in HT1080 cells, which express high  
228 levels of secreted MMP2/9, in conjunction with the antiviral activity of the MMP-2/MMP-9 inhibitor II,  
229 strongly suggests that MMP2 and/or MMP9 play a role in the metalloproteinase-dependent activation of  
230 S. To test this, we sought to knockdown expression of MMP2 and MMP9 in 293T-ACE2 and measure  
231 syncytia formation. We first validated the knockdown efficiency of three dicer substrate interfering RNAs  
232 (dsiRNAs) for both MMP2 and MMP9 in HT1080-ACE2 cells by qPCR and gelatin zymography (Table S1,  
233 Fig.S2AB). As expected, production and secretion of both MMP2/9 was efficiently reduced when  
234 transfected with their respective dsiRNAs, although to different extents. We chose the two best dsiRNAs  
235 for MMP2 and MMP9 respectively for the syncytia formation assay. We transfected 293T-ACE2 cells with  
236 dsiRNAs specific for MMP2, MMP9, or scramble dsiRNA as a control, followed by transfection of a plasmid  
237 encoding SARS-CoV-2 S to test serine protease-independent fusion. Knockdown efficiency of MMP2 and  
238 MMP9 was assessed using gelatin zymography (Fig.4D), although MMP9 was barely visible. Even with  
239 incomplete knockdown, we observed a significant decrease in the extent and kinetics of syncytia

240 formation in the MMP2 and/or MMP9 knockdown cells (Fig.4.ABC). Of note, we did not observe a  
241 significant effect for one of the MMP9-specific dsRNA (#1), although significant reduction was seen  
242 when in combination with a MMP2-specific dsRNA (#2). In contrast, there was no difference in syncytia  
243 formation for cells transfected with the scramble dsRNA (Fig.4.AB). These results strongly suggest that  
244 MMP2 and MMP9 are playing critical roles in the metalloproteinase-dependent SARS-CoV-2 S-mediated  
245 fusion.

246 ***Metalloproteinase inhibitors block syncytia formation and reduce replication of SARS-CoV-2 Alpha in***  
247 ***HT1080-ACE2 cells.***

248 We next sought to validate our findings with replicative SARS-CoV-2. Alpha was used to infect  
249 HT1080-ACE2 cells overnight in the presence of camostat, E64d, TAPI-2, GIX, or vehicle. The next day, cells  
250 were fixed and stained for S protein (S) and nucleocapsid protein (N) to visualize infected cells and an  
251 ELISA on N was performed in parallel to quantify infection. We found that Alpha infection of the HT1080-  
252 ACE2 cells led to the formation of large multinucleated cells in vehicle, camostat and E64d-treated cells  
253 (Fig.5A, S3). While E64d treatment did not prevent syncytia formation, fewer infected cells were observed  
254 and N levels were significantly decreased (Fig.5AB, S3). This suggested that cathepsin inhibition decreases  
255 infection and viral replication, but not S-mediated cell-cell fusion of infected cells. Similarly,  
256 metalloproteinase inhibitors also decreased both the number of infected cells and N expression levels  
257 measured by ELISA. However, these drugs also completely blocked syncytia formation (Fig.5AB, S3),  
258 indicating that metalloproteinases facilitate both entry and cell-cell fusion. Therefore, in agreement with  
259 the VLP assays, in HT1080-ACE2 cells, a proportion of Alpha infections proceeded in a cathepsin-  
260 dependent manner, while other infections proceeded in a metalloproteinase-dependent manner. This  
261 alternative usage of cathepsin or metalloproteinases is likely linked to the processing efficiency of the  
262 incorporated S glycoprotein.

263 ***The Omicron S does not efficiently mediate metalloproteinase-dependent cell-cell fusion and***  
264 ***preferentially uses the serine protease or cathepsin protease pathways for entry.***

265 Since its emergence and discovery, Omicron has spread rapidly worldwide and became the dominant  
266 circulating SARS-CoV-2 variant [49]. Interestingly, recent studies have reported decreased processing of  
267 the spike glycoprotein and potential reduced activation by TMPRSS2 [11, 50]. Given that our findings  
268 support a model by which metalloproteinase usage is dictated by S cleavage at the S1/S2 junction, we  
269 sought to investigate whether the Omicron S could be activated in a metalloproteinase-dependent  
270 manner. We first performed cell-cell fusion assays using 293T-ACE2 cells as effector cells in the presence  
271 or absence of TMPRSS2 expression (Fig.6A). Interestingly, we found that Omicron S mediated only modest  
272 fusion in the absence of TMPRSS2, in contrast to the ancestral, D614G, Alpha, or Delta variant S. As  
273 expected, Omicron S fusion activity was enhanced in the presence of TMPRSS2, albeit to a slightly lower  
274 extent compared to the other SARS-CoV-2 S tested (Fig.6A). In addition, as previously reported and in  
275 accordance with our model, the ratio of S2/S0 in cell lysates was reduced for Omicron when compared to  
276 D614G (Fig.6B).

277 We next assessed the preferential entry route employed by Omicron S using VLPs. We found that, similarly  
278 to other SARS-CoV-2 variants, Omicron used the endosomal cathepsin-dependent pathway in 293T-ACE2  
279 cells and the surface, serine protease-dependent pathway in Calu-3 cells (Fig.6C). However, strikingly,  
280 Omicron did not use the metalloproteinase-dependent pathway in HT1080-ACE2 cells and strictly used  
281 the endosomal route (Fig.6C). Further, compared to Alpha, D614G and Delta VLP, Omicron used the  
282 TMPRSS2-dependent pathway in Calu-3 cells less efficiently, but had similar entry efficiency to D614G in  
283 293T-ACE2 and HT1080-ACE2 cells (Fig.S4). Taken together, our data suggest a shift in protease usage by  
284 Omicron, which may play a part in the differential tropism and pathogenicity observed for this variant.

285 **DISCUSSION**

286 Previous studies have shown that SARS-CoV-1 and SARS-CoV-2 can enter cells via two distinct  
287 ACE2-dependent pathways: a serine protease and a cysteine protease pathway [5, 6]. Here we show that  
288 the SARS-CoV-2 wild-type and variant of concerns (VOCs) S glycoprotein can be triggered via a third  
289 mechanism that is dependent on secreted metalloproteinases (MMPs), specifically MMP2 and MMP9, for  
290 cell-cell fusion and viral entry. The ability to use this entry pathway required high expression of these  
291 proteases and proteolytic processing at the S1/S2 boundary in viral producer cells. Accordingly, usage of  
292 this pathway by SARS-CoV-2 variants correlated with differential extents of S processing in viral producer  
293 cells; the S of Delta preferentially entered via the metalloproteinase route when available, while the S of  
294 Omicron did not. Given that metalloproteinases such as MMP2/9 are released and highly expressed in the  
295 context of lung damage and inflammation during severe COVID-19, this mechanism of activation could  
296 play critical roles in S-mediated cytopathic effects, tropism, and overall pathogenesis.

297 With previous work reporting the presence of syncytia in the lung of deceased COVID-19 patients  
298 [42, 51], the ability of SARS-CoV-2 S to mediate cell-to-cell fusion has been hypothesized to play roles in  
299 both pathogenesis and virus cell-to-cell propagation [51-53]. The formation of such multinucleated cells  
300 is believed to occur by the activation of SARS-CoV-2 S expressed at the cell surface of infected cells [54]  
301 and fusion with neighboring cells expressing ACE2 and serine proteases. However, the relative low  
302 abundance of ACE2+ and TMPRSS2+ cells in the lower airways suggests that there may be additional  
303 factors able to activate S [55-58]. Serine protease-independent SARS-CoV-2 S-mediated cell-cell fusion has  
304 been previously observed in vitro and reported by other studies [16, 17]. Here we show that  
305 metalloproteinases, including MMP2 and MMP9, are critical factors in SARS-CoV-2 S serine protease-  
306 independent fusion (Fig.1E,4,5). More precisely, knockdown of MMP2 and MMP9 reduced S-mediated  
307 syncytia formation in the absence of serine proteases (Fig.4). In addition, Alpha infection and replication  
308 in cells expressing high levels of MMP2 and MMP9 led to substantial fusion of infected cells that was  
309 abrogated by broad-spectrum MMP inhibitors (Fig.5). Several studies have demonstrated increased levels

310 of MMP2 and MMP9 in patients with severe COVID-19, which associated with disease outcome [20, 22,  
311 59, 60]. In addition, infiltrating and activated neutrophils, which are potent source of released MMP-9,  
312 are both associated with severe COVID-19 [1, 61-64]. Our studies suggest a model by which inflammation  
313 and MMP production during COVID-19 increase viral cell-to-cell transmission and exacerbate virus-  
314 induced cytopathic effects further contributing to disease.

315 We demonstrated that entry of SARS-CoV-2 lentiviral particles, virus-like particles and authentic  
316 Alpha variant into host cells can occur in a metalloproteinase-dependent manner (Fig.2E,3E,5B). This  
317 previously unrecognized entry pathway depended on S1/S2 processing in the viral producer cells (Fig.2,3,  
318 6). Therefore, this third entry route is specific to SARS-CoV-2 and cannot be used by SARS-CoV-1, as SARS-  
319 CoV-1 S does not contain the critical S1/S2 furin cleavage site. Whether this additional entry pathway  
320 unique to SARS-CoV-2 played a role in its high transmissibility remain to be determined. Multiple variants  
321 of SARS-CoV-2 have emerged since the beginning of the COVID-19 pandemic, with each having their own  
322 sets of mutations that enhance immune escape and transmissibility. Interestingly, variants such as Alpha,  
323 Delta, Kappa and more recently Omicron possess mutations within the S1/S2 furin cleavage site. Notably,  
324 Delta S harbors the P681R mutation which improves S1/S2 processing and fitness over that of the  
325 ancestral virus and Alpha, which possesses the P681H mutation [12, 65-67]. Other studies, including ours,  
326 have shown that Omicron S is less efficiently processed at the S1/S2 junction compared to ancestral S, S  
327 with a D614G mutation (Fig.6B), and those of VOCs such as Delta [68, 69]. Therefore, as expected, we  
328 found that Omicron S mediated reduced metalloproteinase-dependent cell-cell fusion (Fig.6A). In  
329 addition, VLPs expressing Omicron S were only slightly sensitive to metalloproteinase-dependent entry.  
330 Omicron S has two mutations near the furin cleavage site, N679K and P681H, however the mechanism by  
331 which these or other mutations alter S processing remains to be determined. In addition, whether the  
332 inefficient use of the metalloproteinase pathway for activation of S to mediate viral entry and cell-cell  
333 fusion plays a role in the apparent distinct clinical manifestations and tropism of Omicron is unclear [11,

334 70-73]. Nonetheless, our findings of an additional entry pathway suggest a potential for increased tropism  
335 in the presence of MMPs during inflammation to cells that do not express serine proteases and could play  
336 important roles in dissemination and disease severity.

337         While this manuscript was in preparation, Yamamoto et al. reported in a pre-print a SARS-CoV-2  
338 S-mediated metalloproteinase-dependent entry pathway in which ADAM10 was partially involved in  
339 different cell lines [74]. Although we have not directly studied a role for ADAM10 and it is still unknown if  
340 ADAM10 can cleave SARS-CoV-2 S, our findings and those of Yamamoto and colleagues highlight the  
341 promiscuity of SARS-CoV-2 for host protease activation of S and intensifies the hurdles in the usage of  
342 host protease inhibitors for therapeutic purposes. Interestingly, unlike S activation mediated via  
343 cathepsins or serine proteases, the S activation triggered via metalloproteinases required prior S  
344 processing at the S1/S2 junction. While more work is needed to determine whether MMP2, MMP9, and  
345 other metalloproteinases directly cleave S, the requirement for a processed S suggest that  
346 metalloproteinases can only cleave at the S2' site. Further studies are required to characterize the specific  
347 roles played by the metalloproteinases and to determine the specific S cleavage site involved in the  
348 metalloproteinase pathway.

349         Previous studies investigating immune signatures of severe COVID-19 unveiled vascular  
350 endothelial growth factor A (VEGF-A), a disintegrin and metalloproteinases (ADAMs) and matrix  
351 metalloproteinases (MMPs) as potential markers for severe disease progression [21, 75, 76]. Our data  
352 indicate that increased secretion of MMPs during severe COVID-19 could exacerbate S-mediated  
353 cytopathic effects such as syncytia formation. Furthermore, it could also expand tropism by allowing entry  
354 in serine protease deficient cells, and potentially even in ACE2 deficient cells promoted by shed ACE2  
355 induced by ADAM17 activity [77]. Therefore, usage of the metalloproteinase pathway by current and  
356 future circulating SARS-CoV-2 variants could have profound implications in disease severity, outcome, and  
357 potential sequelae following recovery.

358 **METHODS**

359 ***Cell lines, inhibitors, and antibodies***

360 HEK293T (ATCC), HEK293T-ACE2 (kind gift of Hyeryun Choe, Scripps Research), HT1080 cells (ATCC) and  
361 Calu3 (ATCC) were cultured in Dulbecco's Minimum Essential Medium (DMEM) supplemented with 10%  
362 fetal bovine serum (FBS, Sigma), 100 U/mL penicillin, 100 µg/mL streptomycin, and 0.3 mg/mL L-  
363 glutamine. HT1080 cells stably expressing ACE2 were generated by infection with lentiviral particles  
364 generated with psPAX2, pMDG and pLENTI\_hACE2\_PURO (gift from Raffaele De Francesco (Addgene  
365 plasmid # 155295)) and selection of a polyclonal HT1080-ACE2 cells using 2 µg/mL puromycin. Cells were  
366 maintained at 37°C, 5% CO<sub>2</sub> and 100% relative humidity.

367 The inhibitors Camostat mesylate, GI-254023X and Batimastat were purchased from Cayman Chemical.  
368 E64d and MMP-2/MMP-9 Inhibitor II were from MilliporeSigma and TAPI-2 from Tocris.

369 The monoclonal antibodies SARS-CoV-1/SARS-CoV-2 Spike Protein S2 (1A9) and SARS-CoV-1/SARS-CoV-2  
370 Nucleocapsid (6H3) were purchased from ThermoFisher Scientific. The rabbit polyclonal Anti-GAPDH  
371 antibody were purchased from Abcam. The rabbit polyclonal Anti-HIV-1 p24 antibody was purchased from  
372 MilliporeSigma. The mouse anti-N protein antibody (clone 1C7) was purchased from Bioss Antibodies, and  
373 the rabbit anti-SARS-CoV-2 spike protein (clone 007) antibody, was purchased from Sino Biological.

374 ***SARS-CoV-2 Spike cloning and mutagenesis***

375 The Spike gene sequence from the severe acute respiratory syndrome coronavirus 2 isolate Wuhan-Hu-1  
376 (NC\_045512.2) was codon optimized (GeneArt, ThermoFisher) and gene blocks with overlapping  
377 sequences were synthesized by Bio Basic Inc (Markham, Ontario, Canada). The full gene, untagged or with  
378 a N-terminal FLAG tag, was reconstituted by Gibson assembly, amplified by PCR, and cloned in pCAGGS.  
379 Untagged S mutants (D614G, R815A, and Δ Furin site (deletion of arginine 682, 683 and 685), Δ675-679,



380 and variants (Alpha, Delta, Omicron) were generated by overlapping PCR and described elsewhere [78-  
381 81].

### 382 ***Soluble ACE2 expression and purification***

383 FreeStyle 293F cells (Invitrogen) were grown in FreeStyle 293F medium (Invitrogen) to a density of  $1 \times 10^6$   
384 cells/mL at 37°C with 8 % CO<sub>2</sub> with regular agitation (150 rpm). Cells were transfected with a plasmid  
385 coding for His(8)Tagged-ACE2 ectodomain (residues 1-615; [82]) using ExpiFectamine 293 transfection  
386 reagent, as directed by the manufacturer (Invitrogen). One week later, cells were pelleted and discarded.  
387 Supernatants were filtered using a 0.22 µm filter (Thermo Fisher Scientific). The soluble ACE2 (sACE2) was  
388 purified by nickel affinity columns, as directed by the manufacturer (Invitrogen). The sACE2 preparations  
389 were dialyzed against phosphate-buffered saline (PBS) and stored in aliquots at -80°C until further use. To  
390 assess purity, recombinant proteins were resolved by SDS-PAGE and stained with Coomassie Blue.

### 391 ***Fusion assays***

392 For the syncytium formation assay HEK293T and HEK293T-Ace2 cells were seeded in 24-well plates and  
393 grown to approximately 80% confluency. Cells were then transiently transfected with plasmid DNA  
394 encoding LTR-GFP (kind gift of James Cunningham, Brigham and Women's Hospital, Boston), FLAG-SARS-  
395 CoV2 S wt or indicated mutants, and TMPRSS2 or pCAGGS in a 1:2:5 ratio using jetPRIME (Polyplus-  
396 transfection). Simultaneously, cells were placed in fresh complete media (DMEM supplemented with 10%  
397 FBS, 100 U/mL penicillin, 100 µg/mL streptomycin, 0.3 mg/mL L-glutamine) with 25 µM of Camostat or  
398 vehicle control DMSO. 24 hours post transfection, cells were imaged for syncytium formation using a ZOE  
399 Fluorescent Cell Imager (Bio-Rad) and three different fields for each well were obtained.

400 Cell-cell fusion assay with soluble ACE2, effector HEK293T cells were transiently transfected with plasmid  
401 DNA encoding mCherry, and SARS-CoV2 spike and target HEK293T cells were transiently transfected with  
402 plasmid DNA encoding LTR-GFP, TMPRSS2 or pCAGGS. 24 h post-transfection, effector and target cells

403 were resuspended with 0.56 mM EDTA in PBS and co-cultured in complete media at a 1:1 ratio in the  
404 presence of increasing concentrations of soluble ACE2 (0, 25, 50, 100, 150 µg/mL). Cells were imaged 10h  
405 post-co-culture using a ZOE Fluorescent Cell Imager (Bio-Rad).

406 For the ZipVenus complementation cell fusion assay, HEK293T cells were seeded in a 12-well microplate  
407 (500,000 cells/well) in complete media for 24h. Transient transfections were performed using JetPRIME  
408 (Polyplus transfection, France) according to the manufacturer's instructions. Target cells were transfected  
409 with ZipV1 (0.5µg) alone or with hACE2/pcDNA3 (0.05µg) with or without TMPRSS2/ρIX307(0.45µg).  
410 Effector cells population were transfected with ZipV2 (0.5µg) and SARS-CoV-2-S (0.125µg). Total DNA was  
411 normalized using the empty pCAGGS vector DNA to 1µg. Following transfection, cells were incubated at  
412 37 °C for 24 h. Then, cells were rinsed with PBS and detached with versene (PBS, 0.53mM EDTA) and  
413 counted. 40,000 cells/well of both populations were co-seeded in complete DMEM without phenol red  
414 in a 384-well black plate with optical clear bottom and incubated for 3 hours at 37 °C, 5% CO<sub>2</sub>. Bimolecular  
415 fluorescence complementation (BiFC) signal was acquired using Biotek Synergy Neo2 plate reader (BioTek)  
416 using monochromator set to excitation/emission of 500 and 542 nm. The original BiFC constructs GCN4  
417 leucine zipper-Venus1 (ZipV1) and GCN4 leucine zipper-Venus2 (ZipV2) were sourced from Stephen W.  
418 Michnick [83].

#### 419 ***RNA extraction, quantitative reverse transcription PCR, and analysis***

420 Total RNA was extracted using RNeasy Mini Kit (Qiagen, 74104) according to manufacturer's instructions.  
421 RNA concentrations were determined using Thermo Scientific™ NanoDrop 2000. Complementary DNA  
422 was synthesized using iScript™ Reverse Transcription Supermix (Bio-Rad, 1708840) and qRT-PCR analysis  
423 was performed using SYBR Green master mix (Life Technologies) on a Bio-Rad CFX96™ RT-PCR system.  
424 Primer sequences are shown in Supplementary Table 1.

#### 425 ***Gelatin zymography***

426 HEK293T, HEK293T-ACE2, Calu3 and HT1080 cells were analyzed for MMP2 and MMP9 activity through  
427 zymographic analysis. Cells were plated in a 6-well plate, at 70-80% confluency, media was changed for  
428 FBS-free DMEM (conditioned media). Conditioned media were collected after 24h, centrifuged to remove  
429 debris and concentrated 10X using Amicon Ultra-Centrifugal filter units with a 10kD cutoff  
430 (MilliporeSigma). Total protein concentration was measured using BCA. 40µg of protein per sample were  
431 diluted in a non-reducing sample buffer (4% SDS, 20% glycerol, 0.01% bromophenol blue, 125 mM Tris-  
432 HCl, pH6.8) and loaded to a 10% Zymogram Plus (Gelatin) protein gel from Invitrogen. Following  
433 electrophoresis, gels were washed twice for 30 min in washing buffer (2.5% Triton X-100, 50mM Tris-HCl,  
434 pH7.5, 5mM CaCl<sub>2</sub> and 1µM ZnCl<sub>2</sub>) at room temperature with gentle agitation. Gels were next incubated  
435 overnight at 37 degrees in development buffer (1%Triton X-100, 50mM Tris-HCl, pH7.5, 5mM CaCl<sub>2</sub> and  
436 1µM ZnCl<sub>2</sub>) to initiate enzymatic activity. Gels were stained with Coomassie Blue 0.5% for 1h and destained  
437 with 10% acetic acid and 40% methanol before being scanned.

#### 438 ***Lentiviral pseudotype production and entry assays***

439 HEK293T cells were transiently co-transfected with lentiviral packaging plasmid psPAX2 (gift from Didier  
440 Trono, addgene #12260), lentiviral vector encoding LacZ or Luciferase, and a plasmid encoding the viral  
441 glycoprotein (CoV S or VSV G) at a 1:1:1 ratio using jetPRIME transfection reagent. The supernatant was  
442 harvested at 48, 72, and 96 h post-transfection and filtered with a 0.45 µM filter. Lentivirus particles were  
443 concentrated via ultra-centrifugation (20,000 RPM, 1.5h, 4°C) with a sucrose cushion (20% w/v). Viral  
444 particles were resuspended with PBS and stored at -80° C.

445 Cells were seeded in 96-well plates to achieve approximately 50% confluence after 24 h. After 24 h, cells  
446 were pre-incubated with the inhibitor(s) for 1 h diluted in the respective standard growth media with 5  
447 µg/mL polybrene. Concentrated lentiviruses were also diluted in growth media containing polybrene to  
448 achieve between 100-200 foci following infection. After 24 h incubation with virus and inhibitors, cells

449 were placed in fresh growth media. 72 h post-infection, cells were fixed in formalin and stained with 100  
450  $\mu$ M X-Gal in staining solution (5 mM potassium ferrocyanide, 2 mM magnesium chloride in PBS) and  
451 incubated at 37° C for 16-24 h. Positive foci were manually counted using a light microscope. Inhibitor  
452 focus-forming units (FFUs) were normalized to vehicle control.

#### 453 ***Viral-like particle production and entry assays***

454 SARS-CoV-2 virus-like particles (VLPs) were produced in HEK293T cells by co-transfection of CoV-2-N (1),  
455 CoV-2-M-IRES-E (0.5), CoV-2-Spike (0.0125) and Luc-PS9 (1) [40] at indicated ratios using jetPRIME  
456 transfection reagent (CoV-2-N, CoV-2-M-IRES-E and Luc-PS9 were gifts from Abdullah M. Syed and  
457 Jennifer A. Doudna, Gladstone Institute of Data Science and Biotechnology). N protein harboring the  
458 R203M substitution was used to enhance assembly and production of VLPs, as previously described [84].  
459 For the bald control, the empty vector plasmid, pCAGGS, was transfected instead of the CoV-2-Spike at  
460 similar ratio. Media was changed 24 hours post-transfection and supernatants were collected at 48, 72,  
461 and 96 h post-transfection and filtered with a 0.45  $\mu$ M filter. VLPs in supernatants were concentrated as  
462 described above for the lentivirus particles.

463 For VLP infection, cells were seeded in 96-well plates to achieve approximately 70% confluence the  
464 following day. After 24 h, cells were pre-incubated with the inhibitor(s) for 1 h diluted in 2% serum growth  
465 media with 5  $\mu$ g/mL polybrene. Concentrated VLPs were also diluted in 2% serum growth media  
466 containing polybrene. After 20-24 h incubation with VLP and inhibitors, supernatant was removed, and  
467 cells were rinsed in 1X PBS and lysed by the addition of 40  $\mu$ l passive lysis buffer (Promega) followed by  
468 one freeze-thaw cycle. A Synergy Neo2 Multi-Mode plate reader (BioTek) was used to measure the  
469 luciferase activity of each well after the addition of 50-100  $\mu$ l of reconstituted luciferase assay buffer  
470 (Promega). Inhibitors were normalized to vehicle control.

#### 471 **Knockdown of MMP2 and MMP9**

472 293T-ACE2 and HT1080-ACE2 cells were seeded in 24-well plates and 6-well plates respectively to achieve  
473 70% confluency after 4-6 hours and then transfected with Lipofectamine RNAiMAX (ThermoFisher) using  
474 the indicated dsRNAs (IDT, Table S1) at a final concentration of 10nM. Combination of dsRNA was  
475 performed using a 1:1 ratio to obtain a final concentration of 10nM. After 20 hours, 293T-ACE2 were used  
476 to perform the syncytia assay as described above, and HT1080-ACE2 media was changed to conditioned  
477 media for gelatin zymography as described above. Time-course imaging of the syncytia formation was  
478 performed using an Incucyte-Zoom (EssenBioscience), and images were analyzed in imageJ to measure  
479 the percentage of green surface area over background.

#### 480 ***Immunoblots***

481 Cells were washed in PBS and then lysed in cold lysis buffer (1% Triton X-100, 0.1% IGEPAL CA-630, 150mM  
482 NaCl, 50mM Tris-HCl, pH 7.5) containing protease and phosphatase inhibitors (Cell Signaling). Proteins in  
483 cell lysates were resolved by SDS-PAGE and transferred to polyvinylidenedifluoride (PVDF) membranes.  
484 Membranes were blocked for 1h at RT with blocking buffer (5% skim milk powder dissolved in 25mM Tris,  
485 pH 7.5, 150mM NaCl, and 0.1% Tween-20 [TBST]). Blots were washed in TBST and proteins were detected  
486 using the indicated primary antibodies, HRP-conjugated secondary antibodies, and visualized using  
487 chemiluminescence according to manufacturer protocol (Bio-Rad Clarity ECL substrate).

#### 488 ***Microneutralization assay using live SARS-CoV-2 alpha (B.1.1.7) variant***

489 A previously described in vitro microneutralization assay [85, 86] was performed with modifications and  
490 using the SARS-CoV-2 alpha variant (B.1.1.7 lineage). HT1080-ACE2 cells were cultured in DMEM  
491 supplemented with penicillin (100 U/mL), streptomycin (100 µg/mL), HEPES, L-Glutamine (0.3 mg/mL),  
492 10% FBS (all from Thermo Fisher Scientific) and puromycin (1 µg/mL, InvivoGen). Twenty-four hours  
493 before infection,  $2.5 \times 10^4$  HT1080 ACE2 cells were seeded per well of duplicate 96 well plates in puromycin-  
494 deficient DMEM and cultured overnight (37°C/5% CO<sub>2</sub>) for cell monolayer to adhere. On the day of

495 infection, a deep well plate was used to perform 1:2 serial dilutions for inhibitors listed below in MEM  
496 supplemented with penicillin (100 U/mL), streptomycin (100 µg/mL), HEPES, L-Glutamine (0.3 mg/mL),  
497 0.12% sodium bicarbonate, 2% FBS (all from Thermo Fisher Scientific) and 0.24% BSA (EMD Millipore  
498 Corporation). The inhibitors Camostat (range: 40 µM – 1.25 µM), TAPI-2 (range: 20 µM – 0.675 µM), GI  
499 254023X (range: 40 µM – 1.25 µM) and E64d (range: 20 µM – 1.25 µM) were included in this assay. MEM  
500 + 2% FBS containing DMSO at an equivalent concentration to the above inhibitor dilutions served as the  
501 vehicle control. All media was aspirated from 96 well plates seeded with HT1080-ACE2 cells and replaced  
502 with 100 µL appropriate inhibitor dilution (or vehicle control). Promptly,  $2 \times 10^3$  TCID<sub>50</sub>/mL SARS-CoV-2  
503 alpha variant was prepared in a Biosafety Level 3 laboratory (ImPaKT Facility, Western University) and a  
504 volume corresponding to 100 TCID<sub>50</sub> virus per well was added to wells already containing inhibitor or  
505 vehicle diluted in media. An equivalent volume of media void of virus was added to uninfected control  
506 wells. All wells were gently mixed and cultured overnight at 37°C/5% CO<sub>2</sub>.

507 After overnight culture, media was discarded and replaced with 10% formaldehyde for >24 hours to cross-  
508 link cell monolayers. Wells were washed with PBS, permeabilized for 15 minutes with PBS + 0.1% Triton  
509 X-100 (BDH Laboratory Reagents), washed again in PBS and then blocked for one hour with PBS + 3% non-  
510 fat milk. At this point, one plate was processed as detailed previously [85] to quantify virus infection.  
511 Briefly, a mouse anti-SARS-CoV-2 nucleocapsid (N) protein primary antibody and an anti-mouse IgG HRP  
512 secondary antibody in conjunction with SIGMAFAST™ OPD developing solution (Millipore Sigma)  
513 permitted SARS-CoV-2 infection quantification. The optical density at 490 nm served as the assay readout  
514 and was measured using a Synergy LX multi-mode reader and Gen5 microplate reader and imager  
515 software (Agilent).

516 In parallel and after blocking, the second plate was incubated for one hour with a primary antibody  
517 solution formulated in PBS + 1% non-fat milk containing both mouse anti-N protein (1 µg/mL, clone 1C7)  
518 and rabbit anti-SARS-CoV-2 spike protein (1:500 dilution, clone 007) antibodies. Extensive washing with

519 PBS ensued, followed by a 45-minute incubation with donkey anti-mouse IgG Alexa Fluor Plus 488 (1  
520  $\mu\text{g}/\text{mL}$ , Invitrogen), donkey anti-rabbit IgG Alexa Fluor Plus 594 (2  $\mu\text{g}/\text{mL}$ , Invitrogen) antibodies and DAPI  
521 (1:1000, Millipore Sigma) in PBS + 0.5% BSA consisting of. All wells were then washed three times in PBS,  
522 monolayers were covered with minimal PBS and fluorescence images were acquired with an EVOS™  
523 M7000 Imaging System (Invitrogen).

#### 524 ***Statistical analysis***

525 Data are expressed as mean  $\pm$  standard deviation of the mean (SD). Significance was determined by  
526 analysis of variance (one-way ANOVA) followed by a Dunnett's multiple comparisons test. A p-value lower  
527 than 0.05 was used to indicate a statistically significant difference \*\*\*\*,  $P < 0.0001$ , \*\*\*,  $P < 0.001$ , \*\*,  $P$   
528  $< 0.01$ , ,  $P^* < 0.05$ . Statistical analyses were performed with GraphPad Prism 9.

#### 529 **ACKNOWLEDGEMENTS**

530 We would like to acknowledge technical support from the uOttawa Flow Cytometry & Virometry Core  
531 Facility and the uOttawa Cell Biology and Image Acquisition Core Facility. We would also like to  
532 acknowledge support from the Western University ImPaKT staff for maintaining the facility needed for  
533 our work.

534 This research was funded by a Bhagirath Singh Early Career Award in Infection and Immunity to M.C., a  
535 COVID-19 Rapid Research grant from the Canadian Institutes for Health Research (CIHR, OV3 170632), and  
536 CIHR stream 1 for SARS-CoV-2 Variant Research to M.C. and P.G. Part of this research was also supported  
537 by CIHR operating Pandemic and Health Emergencies Research grant #177958, a CIHR stream 1 and 2 for  
538 SARS-CoV-2 Variant Research to A.F. Part of this research was also supported by CIHR Operating Grant:  
539 Emerging COVID-19 Research Gaps and Priorities #466984 to S.M. This work was also supported by the  
540 Sentinelle COVID Quebec network led by the Laboratoire de Santé Publique du Québec (LSPQ) in  
541 collaboration with Fonds de Recherche du Québec-Santé (FRQS) and Genome Canada – Génomique Québec,

542 and by the Ministère de la Santé et des Services Sociaux (MSSS) and the Ministère de l'Économie et  
543 Innovation (MEI). Funding was also provided by an operating grant from CIHR from the Canadian 2019  
544 Novel Coronavirus (COVID-19) Rapid Research Funding Opportunity (FRN440388 to JDD and GAD) and an  
545 Infrastructure Grant from CFI for the Imaging Pathogens for Knowledge Translation (ImPaKT) Facility  
546 (#36287 to JDD and GAD).

547 K.F. and R.P.M. were supported by Ontario Graduate Scholarships (OGS). C.M.S. was supported by a  
548 graduate scholarship from the Natural Sciences and Engineering Research Council of Canada and an  
549 OGS. M.C. is a Canada Research Chair in Molecular Virology and Antiviral Therapeutics (950-232840) and  
550 a recipient of an Ontario Ministry of Research, Innovation and Science Early Researcher Award (ER18-14-  
551 09). A.F. is a Canada Research Chair on Retroviral Entry (RCHS0235 950-232424). The funders had no role  
552 in study design, data collection and analysis, decision to publish, or preparation of the manuscript.

### 553 **AUTHORS CONTRIBUTIONS**

554 GAD, JDD and MC conceived the study. MB, GL, CF, KF, RPM, AP, AA, CMS, GAD, JDD, and MC designed  
555 experimental approaches. MB, GL, CF, KF, RPM, AP, AA, CMS, JP, GBB, RD, YB, JYL, MC performed  
556 experiments. WLS, SM, AF provided resources. MB, GL, CF, KF, RPM, AP, AA, GAD, JDD, MC analyzed and  
557 interpreted results. PMG, GAD, JDD, MC supervised the study. MB, GL, MC wrote the original draft. Every  
558 author has read and edited the manuscript

### 559 **CONFLICT OF INTEREST**

560 The authors declare that no conflict of interest exists.

### 561 **FIGURE LEGENDS**

562 **Figure 1. SARS-CoV-2 S can mediate cell-cell fusion in a metalloproteinase-dependent manner. (A)**  
563 Schematics of the S glycoprotein and amino acid sequences at the S1/S2 and S2' cleavage sites of mutants  
564 used in this study. In red, amino acids surrounding the cleavage sites, and arrow heads depict the cleavage



565 site. (Created with BioRender) **(B, D)** 293T or 293T stably expressing ACE2 were co-transfected with  
566 plasmids encoding GFP, SARS-CoV-1 or SARS-CoV-2 S WT or indicated mutants, and TMPRSS2, or with an  
567 empty vector, in the presence or absence of Camostat (25 $\mu$ M). Syncytia formation was visualized 24 hours  
568 post-transfection using fluorescence microscopy. **(C, E)** Effector 293T cells transfected with plasmids  
569 encoding SARS-CoV-1 or SARS-CoV-2 S and ZipVenus1, were co-cultured with target 293T cells transfected  
570 with plasmid encoding ZipVenus 2, ACE2 and TMPRSS2, TMPRSS13 or empty vector, in the presence or  
571 absence of indicated protease inhibitors (Camostat 25 $\mu$ M, E64D 10 $\mu$ M, GIX 25402X3 10 $\mu$ M, TAPI-2 40 $\mu$ M,  
572 Batimastat 10 $\mu$ M). Fluorescence generated by the reconstitution of ZIPVenus upon cell-cell fusion was  
573 measured at 4 hours of co-culture. **(F)** 293T cells transfected with plasmids encoding GFP and SARS-CoV-  
574 2 S were co-cultured (1:1 ratio) with Calu-3 cells in the presence of the indicated inhibitors (Camostat  
575 25 $\mu$ M, GIX 10 $\mu$ M). Syncytia were visualized 24 hours post-transfection using fluorescence microscopy.  
576 Each bar shows the mean of triplicate values of 3 independent experiments with error bars showing  
577 standard deviation. Significance was determined by analysis of variance (one-way ANOVA) followed by a  
578 Dunnett's multiple comparisons test. P-value lower than 0.05 was used to indicate a statistically significant  
579 difference (\*\*\*\*,  $P < 0.0001$ , \*\*\*,  $P < 0.001$ , \*\*,  $P < 0.01$ , \*,  $P < 0.05$ ).

580 **Figure 2 SARS-CoV-2 S can mediate viral entry using three distinct pathways, including a new**  
581 **metalloproteinase-dependent entry route in cells expressing high levels of MMP2 and MMP9**

582 **(A,B,E)** 293T-ACE2, Calu-3 and HT1080 transfected with ACE2, were pre-treated for 1 h with 25  $\mu$ M  
583 Camostat, 10  $\mu$ M E64D, 40  $\mu$ M TAPI-2, 10  $\mu$ M GIX or Vehicle (DMSO) followed by addition of lentiviral  
584 pseudoviruses encoding LacZ and bearing the SARS-CoV-2 D614G S, SARS-CoV-1 S, or VSV-G. After 48 h,  
585 cells were fixed and stained with X-gal overnight at 37°C and foci representing infected cells were counted.  
586 Relative infection was calculated as the number of foci in the indicated inhibitor treatment relative to  
587 vehicle treatment. The impact of inhibitors on infection compared to vehicle was analyzed using a two-  
588 way ANOVA and Dunnett's post-hoc analysis. **(C)** Relative mRNA levels of MMP2, MMP9, ADAM10 and

589 ADAM17 in studied cell lines was measured by RT-qPCR. The level of actin mRNA expression in each  
590 sample was used to standardize the data, and normalization on 293T gene expression was performed. **(D)**  
591 Gelatin zymogram of conditioned media (24h) from indicated cell lines reveals secreted MMP2 (72kDa)  
592 and MMP9 (92 KDa) activity, arrows indicate the pro- and active- MMP2 or MMP9. P-value lower than  
593 0.05 was used to indicate a statistically significant difference (\*\*\*\*,  $P < 0.0001$ , \*\*\*,  $P < 0.001$ , \*\*,  $P < 0.01$ ,  
594 \*,  $P < 0.05$ ).

595 **Figure 3 Delta viral-like particles preferentially use the metalloproteinase-dependent entry pathway in**  
596 **HT1080-ACE2 cells**

597 **(A,B)** Processing of spike protein of purified lentiviral (LVP) and virus-like particles (VLP) was analyzed by  
598 immunoblot using an anti-S2 antibody allowing the detection of S0 and S2. As for controls, anti-p24 and  
599 anti-N antibodies were used for LVP and VLP respectively. **(C,D,E)** VLP entry assay on 293T-ACE2, Calu-3  
600 and HT1080-ACE2 cell pre-treated for 1 h with 25  $\mu$ M Camostat, 10  $\mu$ M E64D, 40  $\mu$ M TAPI-2, 10  $\mu$ M GIX,  
601 20  $\mu$ M MMP2/9 inhibitor or Vehicle (DMSO). VLP entry was measured 24h post-infection by measuring  
602 the activity of the luciferase reporter. Each bar shows the mean of triplicate values of 3 independent  
603 experiments (n=3) with standard deviation. Significance was determined by analysis of variance (one-way  
604 ANOVA) followed by a Dunnett's multiple comparisons test. P-value lower than 0.05 was used to indicate  
605 a statistically significant difference (\*\*\*\*,  $P < 0.0001$ , \*\*\*,  $P < 0.001$ , \*\*,  $P < 0.01$ , \*,  $P < 0.05$ ).

606 **Figure 4 MMP2/MMP9 knockdown reduces the metalloproteinase-dependent syncytia formation**

607 **(A)** Representative images of syncytia formation. 293T-ACE2 cells were transfected with the indicated  
608 dsRNAs alone or in combination (1:1 ratio) at a final concentration of 10nM for 20hours, followed by  
609 transfection with pLV-GFP and D614G spike protein. Images were taken 10 hours post-transfection. **(B)**  
610 Quantification of GFP+ surface areas at 10 hours post-transfection normalized to scramble dsRNA. **(C)**  
611 Kinetics of syncytia formation. **(D)** Gelatin zymogram of conditioned media (24h) of dsRNAs transfected

612 293T-ACE2, , arrows indicate the pro- and active- MMP2 or MMP9 Each bar shows the mean of triplicate  
613 values of 3 independent experiments (n=3) with standard deviation. Significance was determined by  
614 analysis of variance (one-way ANOVA) followed by a Dunnett's multiple comparisons test. P-value lower  
615 than 0.05 was used to indicate a statistically significant difference (\*\*\*\*,  $P < 0.0001$ , \*\*\*,  $P < 0.001$ , \*\*,  $P$   
616  $< 0.01$ , \*,  $P < 0.05$ ).

617 **Figure 5 Syncytia formation and Alpha variant infection are blocked by metalloproteinase inhibitors in**  
618 **HT1080-ACE2 cells**

619 **(A)** Visualization of HT1080-ACE2 syncytia formation after infection by Alpha in presence of indicated  
620 inhibitors or vehicle. Cells were treated with Camostat (20  $\mu$ M), E64D (10  $\mu$ M), TAPI-2 (20  $\mu$ M), GIX (10  
621  $\mu$ M) or Vehicle (DMSO) and then infected with Alpha. After 20h, cells were washed, blocked, and stained  
622 with rabbit anti-SARS-CoV-2 spike (S), mouse anti-SARS-CoV-2 nucleocapsid (N) followed by staining with  
623 DAPI, donkey anti-mouse IgG Alexa Fluor Plus 488 and donkey anti-rabbit IgG Alexa Fluor Plus 594  
624 antibodies. Nuclei, S and N proteins are shown in purple, red and green respectively. Fluorescent images  
625 were acquired with an EVOS™ M7000 Imaging System. Images are representative of 3 independent  
626 experiments. **(B)** SARS-CoV-2 infection quantification following infection in presence of indicated  
627 inhibitors or vehicle. 20h post-infection, cells were washed, blocked, permeabilized and stained with  
628 mouse anti-SARS-CoV-2 N protein followed by an anti-mouse IgG HRP in conjunction with SIGMAFAST™  
629 OPD developing solution. Optical density (OD) at 490 nm was measured using Synergy LX multi-mode  
630 reader and Gen5 microplate reader and imager software. The red line indicates the OD obtained for  
631 vehicle. Each bar shows the mean of triplicate values of 3 independent experiments with error bars  
632 showing standard deviation. Significance was determined by analysis of variance (one-way ANOVA)  
633 followed by a Dunnett's multiple comparisons test. P-value lower than 0.05 was used to indicate a  
634 statistically significant difference (\*\*\*\*,  $P < 0.0001$ , \*\*\*,  $P < 0.001$ , \*\*,  $P < 0.01$ , \*,  $P < 0.05$ ).

635 **Figure 6 Omicron S is not effectively triggered in a metalloproteinase-dependent manner**

636 **(A)** Effector 293T cells transfected with plasmids encoding the indicated different spikes, and ZipVenus1,  
637 were co-cultured with target 293T cells transfected with plasmids encoding ZipVenus 2, ACE2 and  
638 TMPRSS2 or empty vector. Fluorescence generated by the reconstitution of ZIPVenus upon cell-cell fusion  
639 was measured at 4 hours of co-culture (1:1 ratio). **(B)** Processing of spike protein on effector 293T cells  
640 was analyzed by western blot (WB). The S2 protein bands were visualized using an anti-S2 antibody  
641 allowing the detection of S0 and S2. As for loading control, anti-GAPDH antibody was used. **(C, D, E)**  
642 Omicron Spike VLP entry assay on **(C)** 293T-ACE2, **(D)** Calu-3 and **(E)** HT1080-ACE2 cells pre-treated for 1  
643 h with 25  $\mu$ M Camostat, 10  $\mu$ M E64D, 40  $\mu$ M TAPI-2, 10  $\mu$ M GIX, 20  $\mu$ M MMP2/9 Inhibitor or Vehicle  
644 (DMSO). VLP entry was measured 24h post-infection by measuring the activity of the luciferase reporter.  
645 Each bar shows the mean of triplicate values of 3 independent experiments with error bars showing  
646 standard deviation. Significance was determined by analysis of variance (one-way ANOVA) followed by a  
647 Dunnett's multiple comparisons test. P-value lower than 0.05 was used to indicate a statistically significant  
648 difference (\*\*\*\*,  $P < 0.0001$ , \*\*\*,  $P < 0.001$ , \*\*,  $P < 0.01$ , \*,  $P < 0.05$ ).

649 **EXPANDED VIEW FIGURE LEGENDS**

650 **Supplemental Figure 1. TMPRSS2 enhances SARS-CoV-2 S fusion activity in an ACE2 dose-dependent**  
651 **manner**

652 HEK293T cells expressing mCherry and SARS-CoV2 spike were co-cultured with HEK293T cells expressing  
653 GFP and TMPRSS2 or with HEK293T cells expressing GFP only in the presence of increasing concentrations  
654 of soluble ACE2 (0, 25, 50, 100, 150  $\mu$ g/mL). Cells were imaged 10h post-co-culture. Representative images  
655 are shown.

656 **Supplemental Figure 2. MMP2/MMP9 knockdown reduces production and secretion in HT1080-ACE2**  
657 **cells**

658 **(A)** HT1080-ACE2 cells were transfected with the indicated dsRNAs at a final concentration of 10nM, and  
659 relative mRNA levels of MMP2 and MMP9 was measured by RT-qPCR. The level of actin mRNA expression  
660 in each sample was used to standardize the data, and normalization on scramble genes expression was  
661 performed. **(B)** Gelatin zymogram of conditioned media (24h) from HT1080-ACE2 cells in **(A)**, arrows  
662 indicate the pro- and active- MMP2 or MMP9.

663 **Supplemental Figure 3. Syncytia formation and infection by replicative Alpha are blocked by**  
664 **metalloproteinase inhibitors in HT1080-Ace2 cells**

665 **(A)** Visualization of HT1080-ACE2 syncytia formation after infection by Alpha in presence of indicated  
666 inhibitors or vehicle. Cells were treated with Camostat (20 uM), E64D (10 uM), TAPI-2 (20 uM), GIX (10  
667 uM) or Vehicle (DMSO), following prompt addition of Alpha variant. After 20h, cells were washed, blocked,  
668 and stained with rabbit anti-SARS-CoV-2 spike (S), mouse anti-SARS-CoV-2 nucleocapsid (N) followed by  
669 staining with DAPI, donkey anti-mouse IgG Alexa Fluor Plus 488 and donkey anti-rabbit IgG Alexa Fluor  
670 Plus 594 antibodies. Nuclei, S and N proteins are shown in purple, red and green respectively. Fluorescent  
671 images were acquired with an EVOS™ M7000 Imaging System. Images are representative of 3  
672 independent experiments. **(B)** SARS-CoV-2 infection quantification following infection in presence of  
673 indicated inhibitors (0.675-40uM) or vehicle. 20h post-infection, cells were washed, blocked,  
674 permeabilized and stained with mouse anti-SARS-CoV-2 N protein followed by an anti-mouse IgG HRP in  
675 conjunction with SIGMAFAST™ OPD developing solution. Optical density (OD) at 490 nm was measured  
676 using Synergy LX multi-mode reader and Gen5 microplate reader and imager software. The red line  
677 indicates the OD obtained for vehicle. Each bar shows the mean of triplicate values of 3 independent  
678 experiments with error bars showing standard deviation. Significance was determined by analysis of  
679 variance (one-way ANOVA) followed by a Dunnett's multiple comparisons test. P-value lower than 0.05  
680 was used to indicate a statistically significant difference (\*\*\*\*,  $P < 0.0001$ , \*\*\*,  $P < 0.001$ , \*\*,  $P < 0.01$ , \*,  
681  $P < 0.05$ ).

682 **Supplemental Figure 4. Omicron uses less efficiently the TMPRSS2-dependent entry pathway**  
683 **compared to other variant of concerns**

684 Variant of concerns virus-like particle entry assay on 293T-ACE2 (A), Calu-3 (B) and HT1080-ACE2 (C). VLPs  
685 entry were measured 24h after incubation with VLP and normalized as fold over D614G. Each bar shows  
686 the mean of triplicate values of 3 independent experiments with error bars showing standard deviation.  
687 Significance was determined by analysis of variance (one-way ANOVA) followed by a Dunnett's multiple  
688 comparisons test. P-value lower than 0.05 was used to indicate a statistically significant difference (\*\*\*\*,  
689  $P < 0.0001$ , \*\*\*,  $P < 0.001$ , \*\*,  $P < 0.01$ , \*,  $P < 0.05$ )

690

691 **REFERENCES**

- 692 1. Huang, C., et al., *Clinical features of patients infected with 2019 novel coronavirus in Wuhan,*  
693 *China.* Lancet (London, England), 2020. **395**(10223): p. 497-506.
- 694 2. Tay, M.Z., et al., *The trinity of COVID-19: immunity, inflammation and intervention.* Nature  
695 Reviews Immunology, 2020. **20**(6): p. 363-374.
- 696 3. Braga, L., et al., *Drugs that inhibit TMEM16 proteins block SARS-CoV-2 spike-induced syncytia.*  
697 *Nature*, 2021. **594**(7861): p. 88-93.
- 698 4. Harrison, S.C., *Viral membrane fusion.* Virology, 2015. **479-480**: p. 498-507.
- 699 5. Shang, J., et al., *Cell entry mechanisms of SARS-CoV-2.* Proceedings of the National Academy of  
700 Sciences, 2020. **117**(21): p. 11727-11734.
- 701 6. Hoffmann, M., et al., *SARS-CoV-2 Cell Entry Depends on ACE2 and TMPRSS2 and Is Blocked by a*  
702 *Clinically Proven Protease Inhibitor.* Cell, 2020. **181**(2): p. 271-280.e8.
- 703 7. Tang, T., et al., *Proteolytic Activation of SARS-CoV-2 Spike at the S1/S2 Boundary: Potential Role*  
704 *of Proteases beyond Furin.* ACS Infectious Diseases, 2021. **7**(2): p. 264-272.
- 705 8. Peacock, T.P., et al., *The furin cleavage site in the SARS-CoV-2 spike protein is required for*  
706 *transmission in ferrets.* Nat Microbiol, 2021. **6**(7): p. 899-909.
- 707 9. Hoffmann, M., H. Kleine-Weber, and S. Pöhlmann, *A Multibasic Cleavage Site in the Spike*  
708 *Protein of SARS-CoV-2 Is Essential for Infection of Human Lung Cells.* Mol Cell, 2020. **78**(4): p.  
709 779-784.e5.
- 710 10. Lubinski, B., et al., *Functional evaluation of the P681H mutation on the proteolytic activation of*  
711 *the SARS-CoV-2 variant B.1.1.7 (Alpha) spike.* iScience, 2022. **25**(1): p. 103589-103589.
- 712 11. Meng, B., et al., *Altered TMPRSS2 usage by SARS-CoV-2 Omicron impacts tropism and*  
713 *fusogenicity.* Nature, 2022.
- 714 12. Saito, A., et al., *Enhanced fusogenicity and pathogenicity of SARS-CoV-2 Delta P681R mutation.*  
715 *Nature*, 2021.

- 716 13. Murgolo, N., et al., *SARS-CoV-2 tropism, entry, replication, and propagation: Considerations for*  
717 *drug discovery and development*. PLOS Pathogens, 2021. **17**(2): p. e1009225.
- 718 14. *Effect of Hydroxychloroquine in Hospitalized Patients with Covid-19*. New England Journal of  
719 Medicine, 2020. **383**(21): p. 2030-2040.
- 720 15. Buchrieser, J., et al., *Syncytia formation by SARS-CoV-2-infected cells*. The EMBO Journal, 2020.  
721 **39**(23): p. e106267.
- 722 16. Nguyen, H.T., et al., *Spike glycoprotein and host cell determinants of SARS-CoV-2 entry and*  
723 *cytopathic effects*. J Virol, 2020. **95**(5).
- 724 17. Hörnich, B.F., et al., *SARS-CoV-2 and SARS-CoV Spike-Mediated Cell-Cell Fusion Differ in Their*  
725 *Requirements for Receptor Expression and Proteolytic Activation*. Journal of Virology, 2021.  
726 **95**(9): p. e00002-21.
- 727 18. Page-McCaw, A., A.J. Ewald, and Z. Werb, *Matrix metalloproteinases and the regulation of tissue*  
728 *remodelling*. Nat Rev Mol Cell Biol, 2007. **8**(3): p. 221-33.
- 729 19. Singh, D., et al., *Multifaceted role of matrix metalloproteinases (MMPs)*. Frontiers in Molecular  
730 Biosciences, 2015. **2**.
- 731 20. Ueland, T., et al., *Distinct and early increase in circulating MMP-9 in COVID-19 patients with*  
732 *respiratory failure*. The Journal of infection, 2020. **81**(3): p. e41-e43.
- 733 21. Syed, F., et al., *Excessive Matrix Metalloproteinase-1 and Hyperactivation of Endothelial Cells*  
734 *Occurred in COVID-19 Patients and Were Associated With the Severity of COVID-19*. The Journal  
735 of Infectious Diseases, 2021. **224**(1): p. 60-69.
- 736 22. Gelzo, M., et al., *Matrix metalloproteinases (MMP) 3 and 9 as biomarkers of severity in COVID-*  
737 *19 patients*. Scientific Reports, 2022. **12**(1): p. 1212.
- 738 23. Glowacka, I., et al., *Evidence that TMPRSS2 Activates the Severe Acute Respiratory Syndrome*  
739 *Coronavirus Spike Protein for Membrane Fusion and Reduces Viral Control by the Humoral*  
740 *Immune Response*. Journal of Virology, 2011. **85**(9): p. 4122-4134.
- 741 24. Carter-Timothe, M.E., et al., *Antiviral Potential of the Antimicrobial Drug Atovaquone against*  
742 *SARS-CoV-2 and Emerging Variants of Concern*. ACS Infect Dis, 2021. **7**(11): p. 3034-3051.
- 743 25. Zang, R., et al., *TMPRSS2 and TMPRSS4 promote SARS-CoV-2 infection of human small intestinal*  
744 *enterocytes*. Sci Immunol, 2020. **5**(47).
- 745 26. Kishimoto, M., et al., *TMPRSS11D and TMPRSS13 Activate the SARS-CoV-2 Spike Protein*. Viruses,  
746 2021. **13**(3).
- 747 27. Hoffmann, M., et al., *Camostat mesylate inhibits SARS-CoV-2 activation by TMPRSS2-related*  
748 *proteases and its metabolite GBPA exerts antiviral activity*. eBioMedicine, 2021. **65**.
- 749 28. Bertram, S., et al., *Cleavage and Activation of the Severe Acute Respiratory Syndrome*  
750 *Coronavirus Spike Protein by Human Airway Trypsin-Like Protease*. Journal of Virology, 2011.  
751 **85**(24): p. 13363-13372.
- 752 29. Zhang, C., et al., *Intracellular autoactivation of TMPRSS11A, an airway epithelial transmembrane*  
753 *serine protease*. Journal of Biological Chemistry, 2020. **295**(36): p. 12686-12696.
- 754 30. Laporte, M., et al., *The SARS-CoV-2 and other human coronavirus spike proteins are fine-tuned*  
755 *towards temperature and proteases of the human airways*. PLoS Pathog, 2021. **17**(4): p.  
756 e1009500.
- 757 31. Belouzard, S., V.C. Chu, and G.R. Whittaker, *Activation of the SARS coronavirus spike protein via*  
758 *sequential proteolytic cleavage at two distinct sites*. Proc Natl Acad Sci U S A, 2009. **106**(14): p.  
759 5871-6.
- 760 32. Le Coupanec, A., et al., *Potential differences in cleavage of the S protein and type-1 interferon*  
761 *together control human coronavirus infection, propagation, and neuropathology within the*  
762 *central nervous system*. J Virol, 2021. **95**(10).



- 763 33. Yu, S., et al., *SARS-CoV-2 spike engagement of ACE2 primes S2' site cleavage and fusion*  
764 *initiation*. Proceedings of the National Academy of Sciences, 2022. **119**(1): p. e2111199119.
- 765 34. Saccon, E., et al., *Cell-type-resolved quantitative proteomics map of interferon response against*  
766 *SARS-CoV-2*. iScience, 2021. **24**(5).
- 767 35. Koch, J., et al., *TMPRSS2 expression dictates the entry route used by SARS-CoV-2 to infect host*  
768 *cells*. The EMBO journal, 2021. **40**(16): p. e107821-e107821.
- 769 36. Zocchi, M.R., et al., *ADAM10 new selective inhibitors reduce NKG2D ligand release sensitizing*  
770 *Hodgkin lymphoma cells to NKG2D-mediated killing*. OncoImmunology, 2016. **5**(5): p. e1123367.
- 771 37. Raissi, A.J., et al., *Enhanced potency of the metalloprotease inhibitor TAPI-2 by multivalent*  
772 *display*. Bioorganic & medicinal chemistry letters, 2014. **24**(8): p. 2002-2007.
- 773 38. Fu, X., L. Tao, and X. Zhang, *Comprehensive and systemic optimization for improving the yield of*  
774 *SARS-CoV-2 spike pseudotyped virus*. Molecular Therapy - Methods & Clinical Development,  
775 2021. **20**: p. 350-356.
- 776 39. Wang, Q., et al., *Functional differences among the spike glycoproteins of multiple emerging*  
777 *severe acute respiratory syndrome coronavirus 2 variants of concern*. iScience, 2021. **24**(11).
- 778 40. Syed, A.M., et al., *Rapid assessment of SARS-CoV-2 evolved variants using virus-like*  
779 *particles*. Science, 2021. **374**(6575): p. 1626-1632.
- 780 41. Zhang, S., et al., *Analysis of Glycosylation and Disulfide Bonding of Wild-Type SARS-CoV-2 Spike*  
781 *Glycoprotein*. Journal of Virology, 2022. **96**(3): p. e01626-21.
- 782 42. Ou, X., et al., *Characterization of spike glycoprotein of SARS-CoV-2 on virus entry and its immune*  
783 *cross-reactivity with SARS-CoV*. Nature Communications, 2020. **11**(1): p. 1620.
- 784 43. Zeng, C., et al., *Neutralizing antibody against SARS-CoV-2 spike in COVID-19 patients, health care*  
785 *workers, and convalescent plasma donors*. JCI Insight, 2020. **5**(22).
- 786 44. Plescia, C.B., et al., *SARS-CoV-2 viral budding and entry can be modeled using BSL-2 level virus-*  
787 *like particles*. Journal of Biological Chemistry, 2021. **296**: p. 100103.
- 788 45. Peacock, T.P., et al., *The SARS-CoV-2 variants associated with infections in India, B.1.617, show*  
789 *enhanced spike cleavage by furin*. bioRxiv, 2021: p. 2021.05.28.446163.
- 790 46. Vu, M.N., et al., *QTQTN motif upstream of the furin-cleavage site plays key role in SARS-CoV-2*  
791 *infection and pathogenesis*. bioRxiv, 2021: p. 2021.12.15.472450.
- 792 47. Liu, Z., et al., *Identification of Common Deletions in the Spike Protein of Severe Acute Respiratory*  
793 *Syndrome Coronavirus 2*. Journal of Virology, 2020. **94**(17): p. e00790-20.
- 794 48. Zou, W., et al., *The SARS-CoV-2 Transcriptome and the Dynamics of the S Gene Furin Cleavage*  
795 *Site in Primary Human Airway Epithelia*. mBio, 2021. **12**(3): p. e01006-21.
- 796 49. Viana, R., et al., *Rapid epidemic expansion of the SARS-CoV-2 Omicron variant in southern Africa*.  
797 Nature, 2022.
- 798 50. Suzuki, R., et al., *Attenuated fusogenicity and pathogenicity of SARS-CoV-2 Omicron variant*.  
799 Nature, 2022.
- 800 51. Bussani, R., et al., *Persistence of viral RNA, pneumocyte syncytia and thrombosis are hallmarks of*  
801 *advanced COVID-19 pathology*. EBioMedicine, 2020. **61**: p. 103104.
- 802 52. Zhang, Z., et al., *SARS-CoV-2 spike protein dictates syncytium-mediated lymphocyte elimination*.  
803 Cell Death & Differentiation, 2021. **28**(9): p. 2765-2777.
- 804 53. Zeng, C., et al., *SARS-CoV-2 spreads through cell-to-cell transmission*. Proceedings of the  
805 National Academy of Sciences, 2022. **119**(1): p. e2111400119.
- 806 54. Ding, S., et al., *SARS-CoV-2 Spike Expression at the Surface of Infected Primary Human Airway*  
807 *Epithelial Cells*. Viruses, 2022. **14**(1): p. 5.
- 808 55. Hou, Y.J., et al., *SARS-CoV-2 Reverse Genetics Reveals a Variable Infection Gradient in the*  
809 *Respiratory Tract*. Cell, 2020. **182**(2): p. 429-446.e14.



- 810 56. Hikmet, F., et al., *The protein expression profile of ACE2 in human tissues*. Mol Syst Biol, 2020.  
811 **16**(7): p. e9610.
- 812 57. Zou, X., et al., *Single-cell RNA-seq data analysis on the receptor ACE2 expression reveals the*  
813 *potential risk of different human organs vulnerable to 2019-nCoV infection*. Front Med, 2020.  
814 **14**(2): p. 185-192.
- 815 58. Saheb Sharif-Askari, N., et al., *Airways Expression of SARS-CoV-2 Receptor, ACE2, and TMPRSS2*  
816 *Is Lower in Children Than Adults and Increases with Smoking and COPD*. Mol Ther Methods Clin  
817 Dev, 2020. **18**: p. 1-6.
- 818 59. C, D.A.-M., et al., *MMP-2 and MMP-9 levels in plasma are altered and associated with mortality*  
819 *in COVID-19 patients*. Biomed Pharmacother, 2021. **142**: p. 112067.
- 820 60. Abers, M.S., et al., *An immune-based biomarker signature is associated with mortality in COVID-*  
821 *19 patients*. JCI Insight, 2021. **6**(1).
- 822 61. Meizlish, M.L., et al., *A neutrophil activation signature predicts critical illness and mortality in*  
823 *COVID-19*. Blood Adv, 2021. **5**(5): p. 1164-1177.
- 824 62. Giamarellos-Bourboulis, E.J., et al., *Complex Immune Dysregulation in COVID-19 Patients with*  
825 *Severe Respiratory Failure*. Cell Host Microbe, 2020. **27**(6): p. 992-1000.e3.
- 826 63. Schulte-Schrepping, J., et al., *Severe COVID-19 Is Marked by a Dysregulated Myeloid Cell*  
827 *Compartment*. Cell, 2020. **182**(6): p. 1419-1440.e23.
- 828 64. Ardi, V.C., et al., *Human neutrophils uniquely release TIMP-free MMP-9 to provide a potent*  
829 *catalytic stimulator of angiogenesis*. Proceedings of the National Academy of Sciences, 2007.  
830 **104**(51): p. 20262-20267.
- 831 65. Arora, P., et al., *B.1.617.2 enters and fuses lung cells with increased efficiency and evades*  
832 *antibodies induced by infection and vaccination*. Cell Reports, 2021. **37**(2).
- 833 66. Mlcochova, P., et al., *SARS-CoV-2 B.1.617.2 Delta variant replication and immune evasion*.  
834 Nature, 2021. **599**(7883): p. 114-119.
- 835 67. Twohig, K.A., et al., *Hospital admission and emergency care attendance risk for SARS-CoV-2 delta*  
836 *(B.1.617.2) compared with alpha (B.1.1.7) variants of concern: a cohort study*. The Lancet  
837 Infectious Diseases, 2022. **22**(1): p. 35-42.
- 838 68. Du, X., et al., *Omicron adopts a different strategy from Delta and other variants to adapt to host*.  
839 Signal Transduction and Targeted Therapy, 2022. **7**(1): p. 45.
- 840 69. Wang, Q., et al., *Functional properties of the spike glycoprotein of the emerging SARS-CoV-2*  
841 *variant B.1.1.529*. bioRxiv, 2021: p. 2021.12.27.474288.
- 842 70. Wolter, N., et al., *Early assessment of the clinical severity of the SARS-CoV-2 omicron variant in*  
843 *South Africa: a data linkage study*. The Lancet, 2022. **399**(10323): p. 437-446.
- 844 71. Yuan, S., et al., *The SARS-CoV-2 Omicron (B.1.1.529) variant exhibits altered pathogenicity,*  
845 *transmissibility, and fitness in the golden Syrian hamster model*. bioRxiv, 2022: p.  
846 2022.01.12.476031.
- 847 72. Lauring, A.S., et al., *Clinical Severity and mRNA Vaccine Effectiveness for Omicron, Delta, and*  
848 *Alpha SARS-CoV-2 Variants in the United States: A Prospective Observational Study*. medRxiv,  
849 2022: p. 2022.02.06.22270558.
- 850 73. Maslo, C., et al., *Characteristics and Outcomes of Hospitalized Patients in South Africa During the*  
851 *COVID-19 Omicron Wave Compared With Previous Waves*. JAMA, 2022. **327**(6): p. 583-584.
- 852 74. Yamamoto, M., et al., *Metalloproteinase-dependent and TMPRSS2-independent cell surface entry*  
853 *pathway of SARS-CoV-2 requires the furin-cleavage site and the S2 domain of spike protein*.  
854 bioRxiv, 2021: p. 2021.12.14.472513.
- 855 75. Hardy, E. and C. Fernandez-Patron, *Targeting MMP-Regulation of Inflammation to Increase*  
856 *Metabolic Tolerance to COVID-19 Pathologies: A Hypothesis*. Biomolecules, 2021. **11**(3): p. 390.

- 857 76. Carapito, R., et al., *Identification of driver genes for critical forms of COVID-19 in a deeply*  
858 *phenotyped young patient cohort*. *Science Translational Medicine*, 2022. **14**(628): p. eabj7521.
- 859 77. Heurich, A., et al., *TMPRSS2 and ADAM17 Cleave ACE2 Differentially and Only Proteolysis by*  
860 *TMPRSS2 Augments Entry Driven by the Severe Acute Respiratory Syndrome Coronavirus Spike*  
861 *Protein*. *Journal of Virology*, 2014. **88**(2): p. 1293-1307.
- 862 78. Tauzin, A., et al., *Strong humoral immune responses against SARS-CoV-2 Spike after BNT162b2*  
863 *mRNA vaccination with a 16-week interval between doses*. *Cell Host & Microbe*, 2022. **30**(1): p.  
864 97-109.e5.
- 865 79. Chatterjee, D., et al., *SARS-CoV-2 Omicron Spike recognition by plasma from individuals receiving*  
866 *BNT162b2 mRNA vaccination with a 16-weeks interval between doses*. *Cell Reports*.
- 867 80. Chatterjee, D., et al., *Antigenicity of the Mu (B.1.621) and A.2.5 SARS-CoV-2 Spikes*. *Viruses*,  
868 2022. **14**(1): p. 144.
- 869 81. Gong, S.Y., et al., *Contribution of single mutations to selected SARS-CoV-2 emerging variants*  
870 *spike antigenicity*. *Virology*, 2021. **563**: p. 134-145.
- 871 82. Wrapp, D., et al., *Cryo-EM structure of the 2019-nCoV spike in the prefusion conformation*.  
872 *Science*, 2020. **367**(6483): p. 1260-1263.
- 873 83. Michnick, S.W., et al., *A toolkit of protein-fragment complementation assays for studying and*  
874 *dissecting large-scale and dynamic protein-protein interactions in living cells*. *Methods Enzymol*,  
875 2010. **470**: p. 335-68.
- 876 84. Syed, A.M., et al., *Omicron mutations enhance infectivity and reduce antibody neutralization of*  
877 *SARS-CoV-2 virus-like particles*. *medRxiv*, 2022: p. 2021.12.20.21268048.
- 878 85. Ullah, I., et al., *Live imaging of SARS-CoV-2 infection in mice reveals that neutralizing antibodies*  
879 *require Fc function for optimal efficacy*. *Immunity*, 2021. **54**(9): p. 2143-2158.e15.
- 880 86. Gasser, R., et al., *Major role of IgM in the neutralizing activity of convalescent plasma against*  
881 *SARS-CoV-2*. *Cell Rep*, 2021. **34**(9): p. 108790.

882

# Figure 1

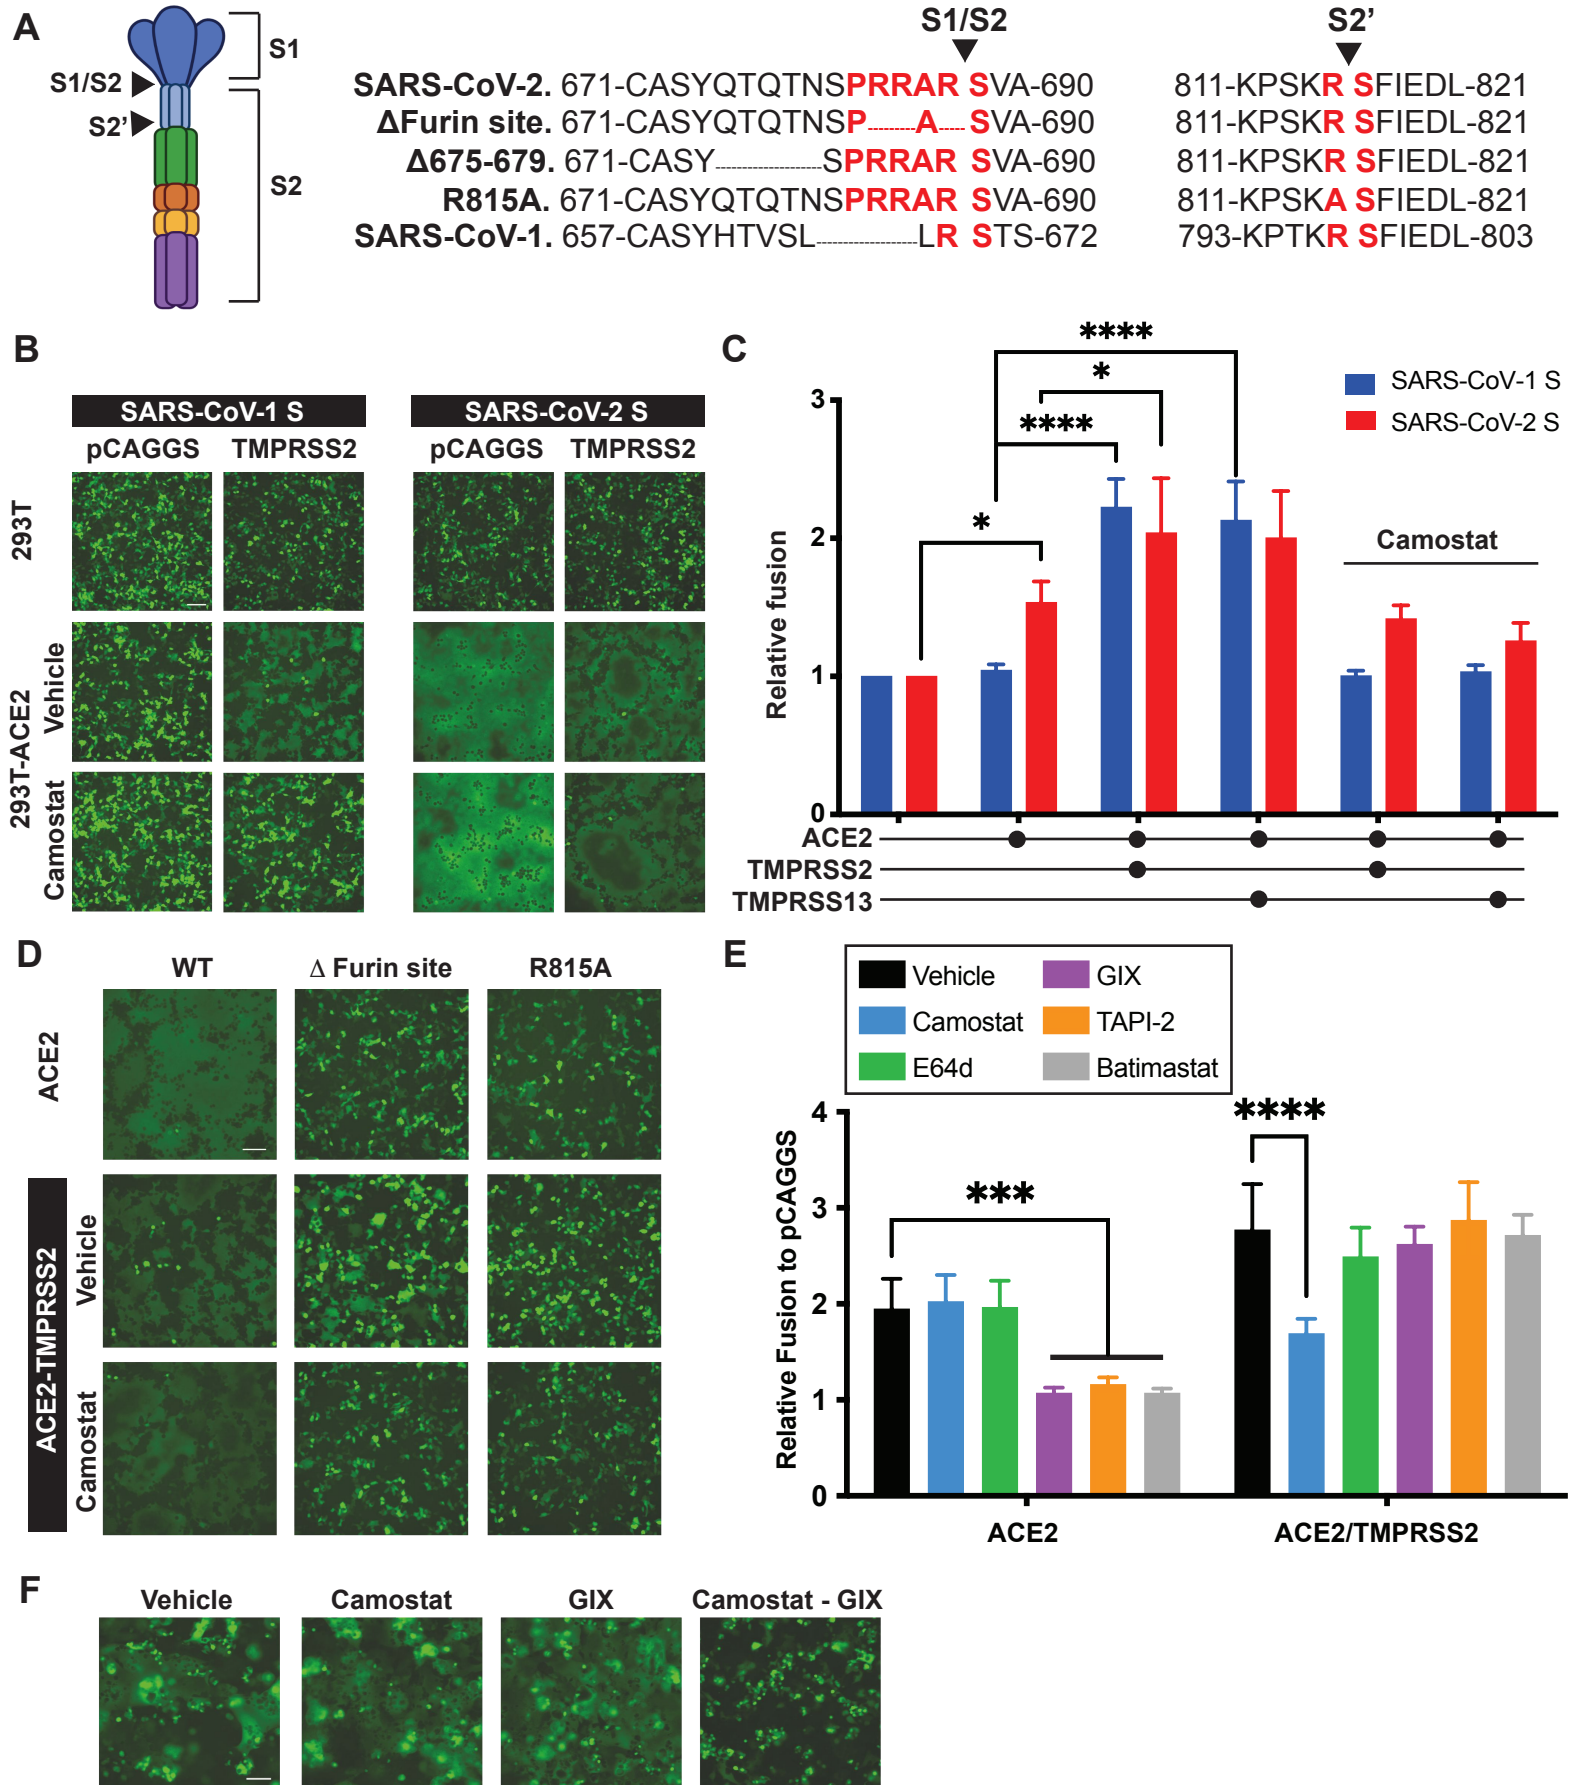

## Figure 2

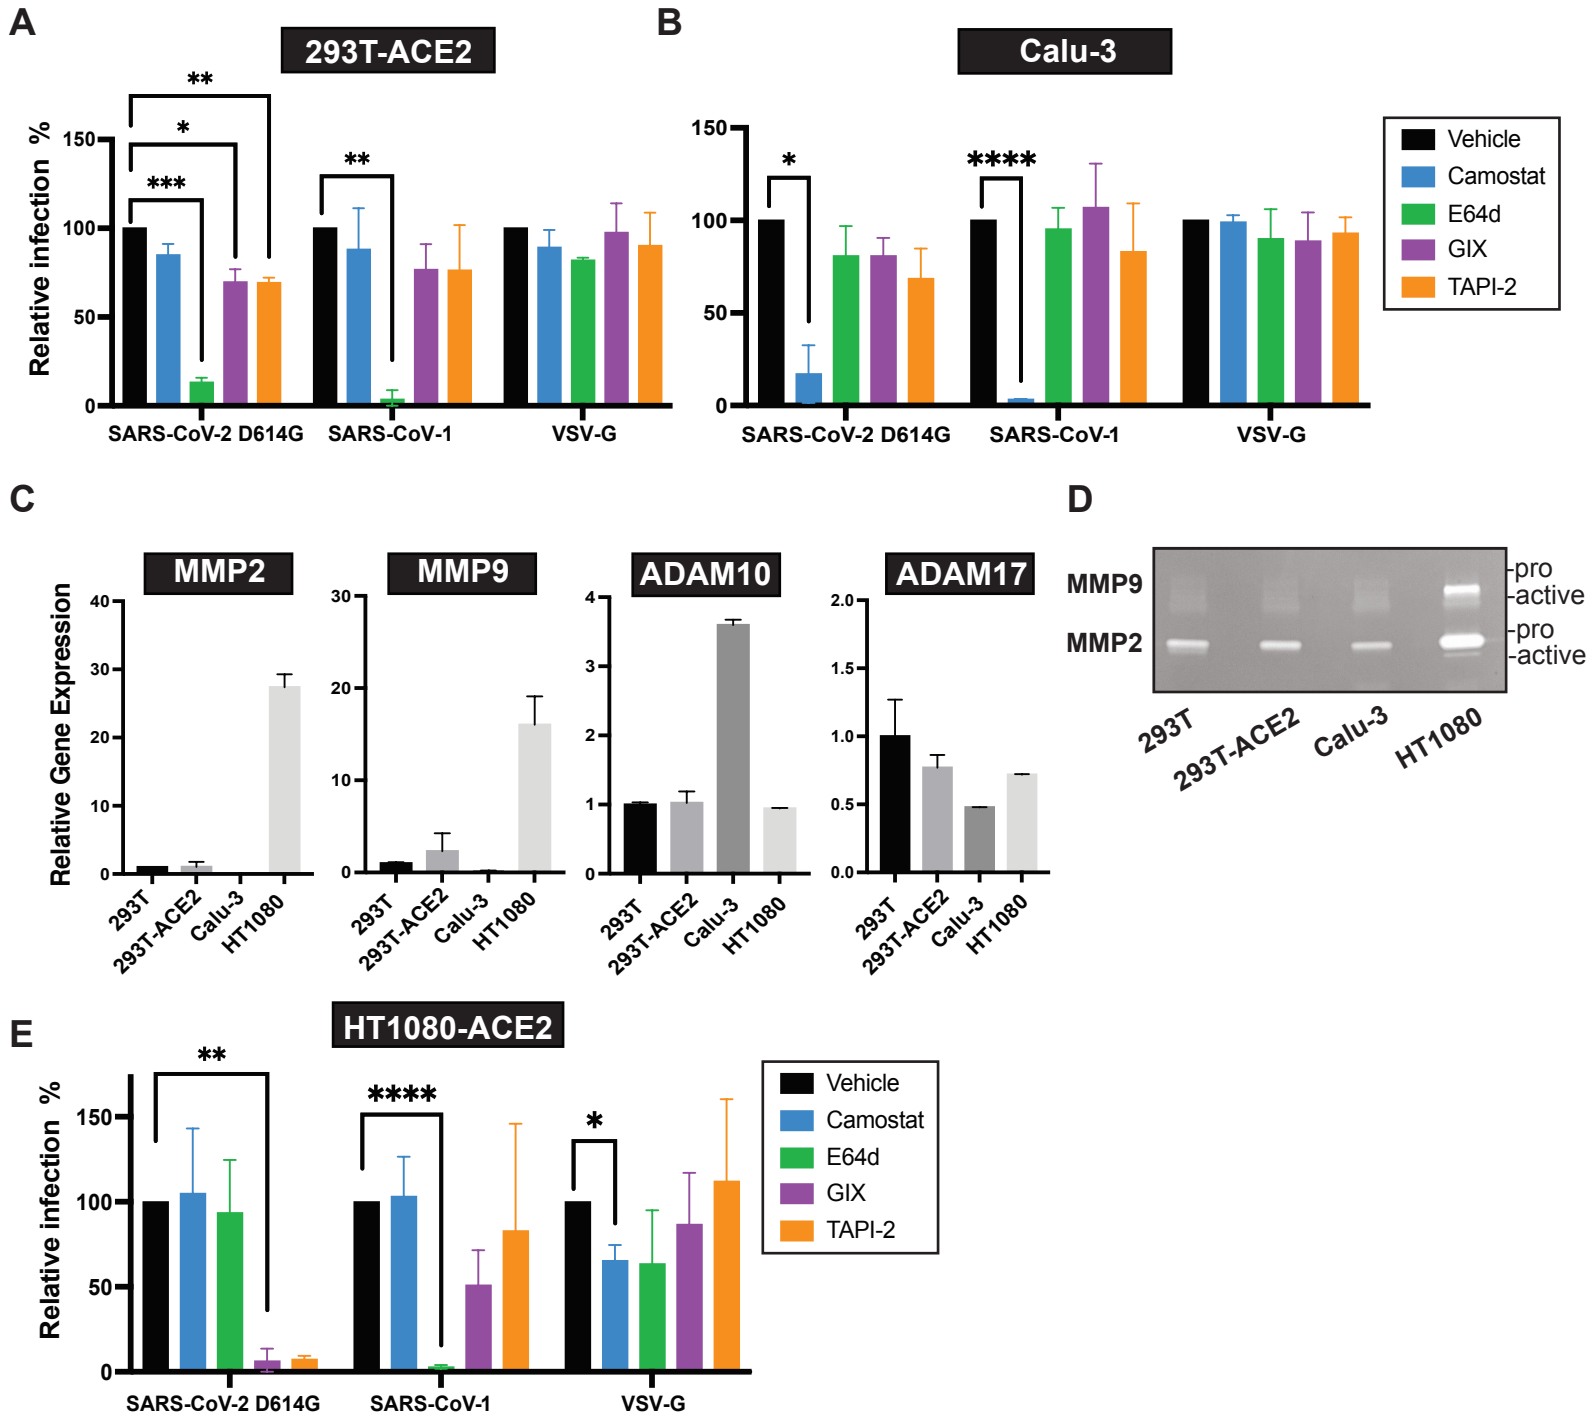

## Figure 3

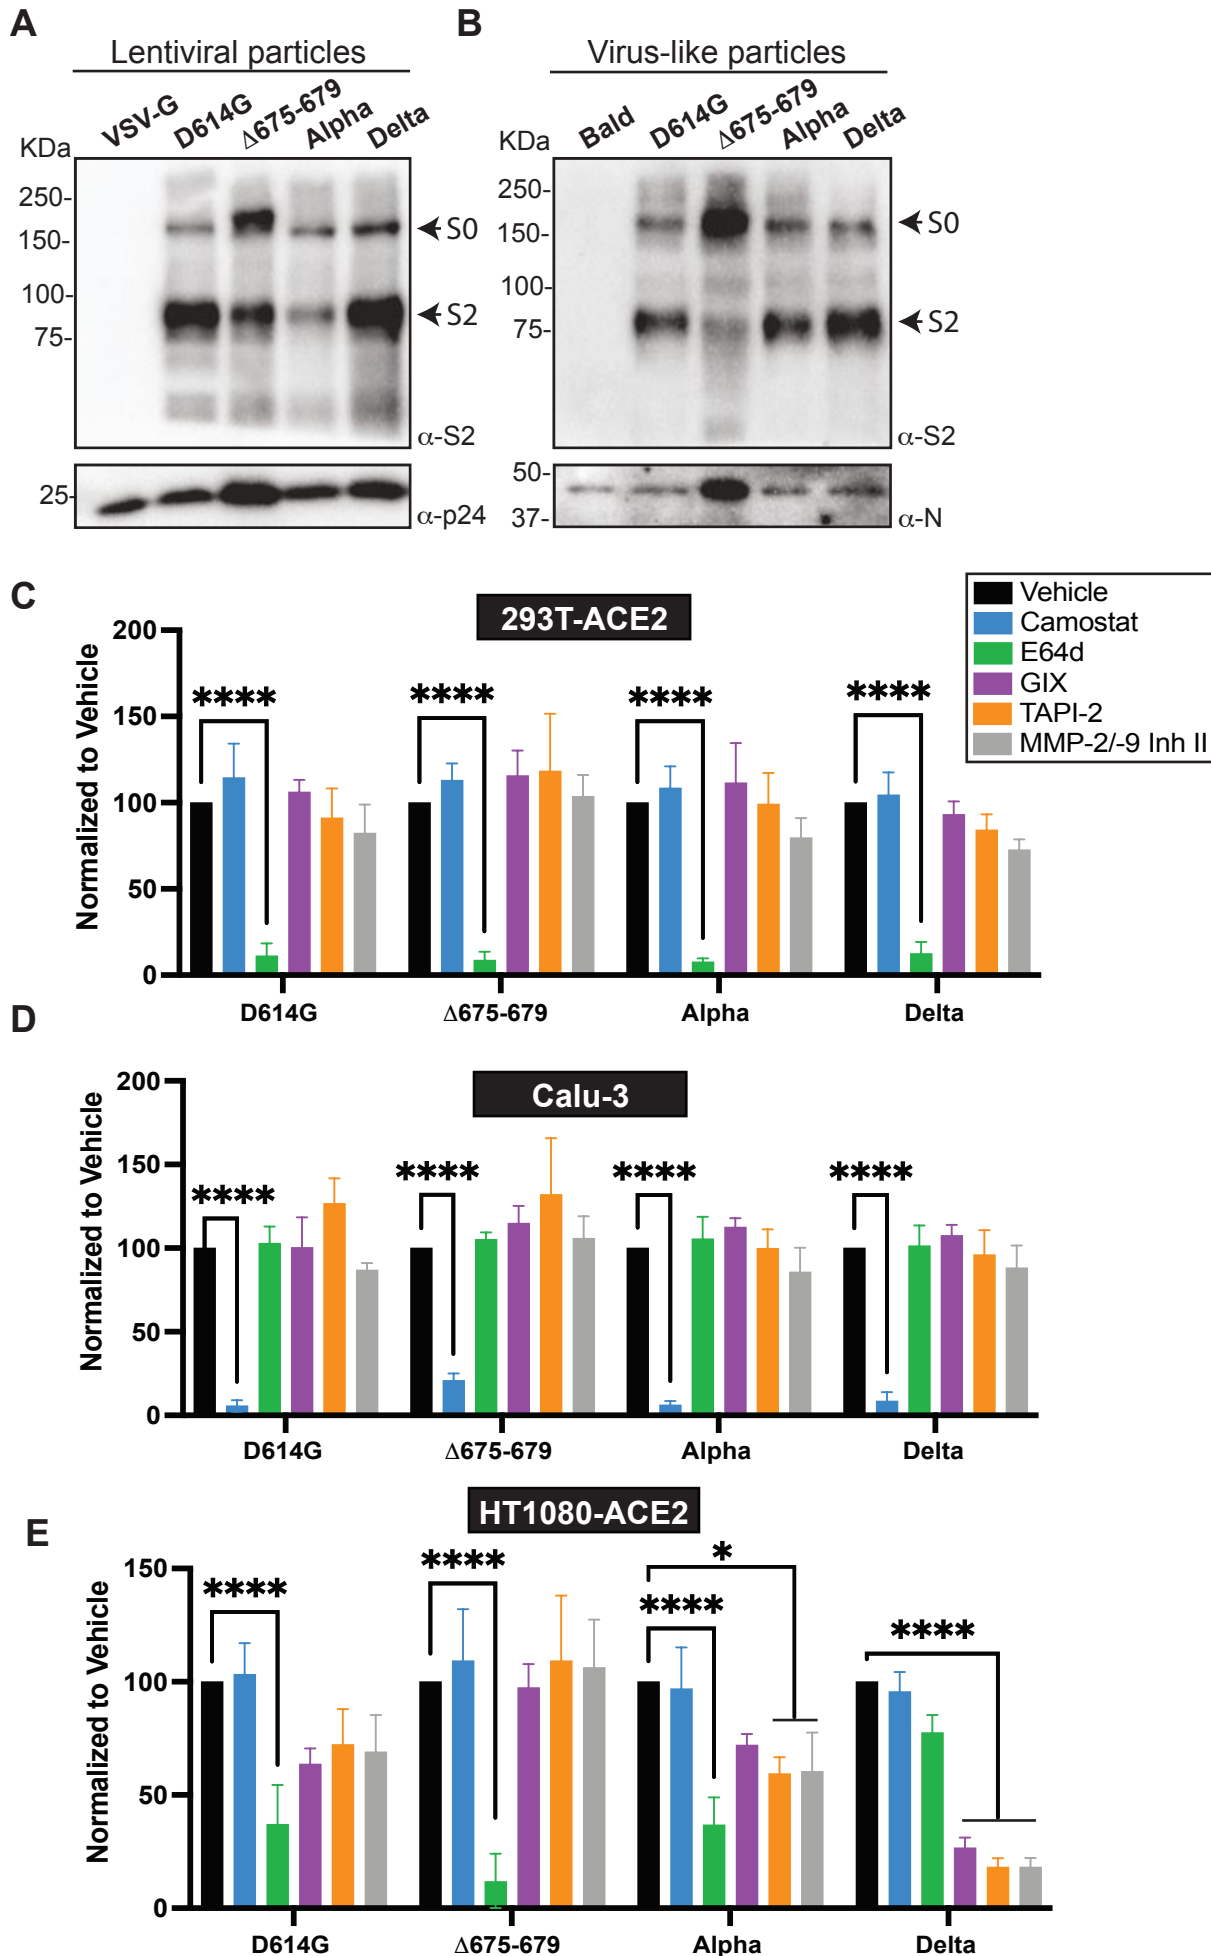



# Figure 4

A

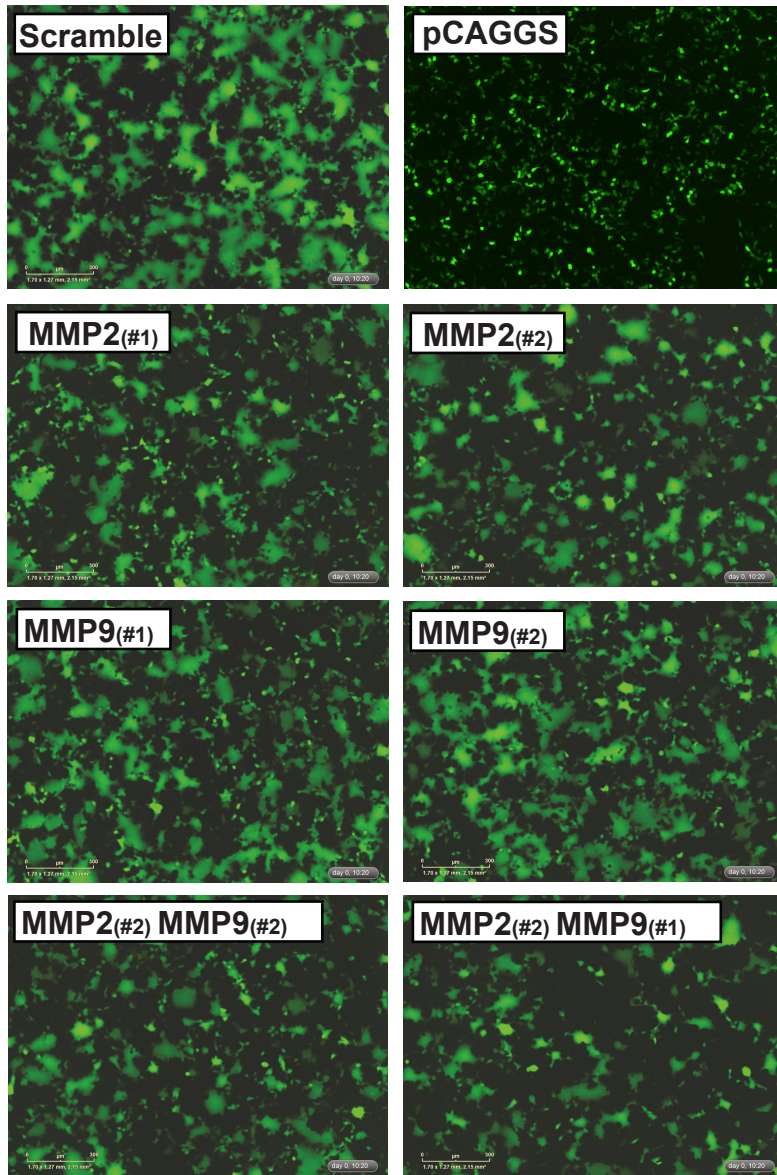

B

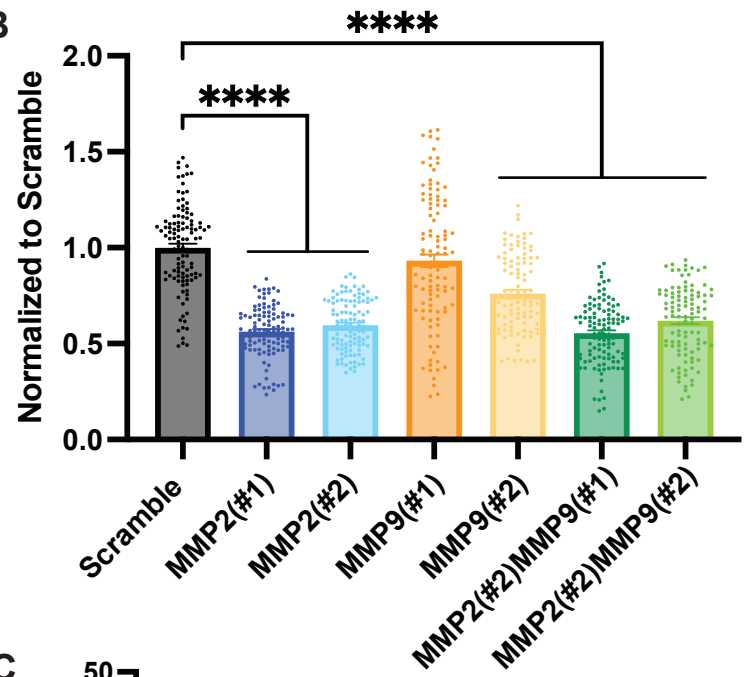

C

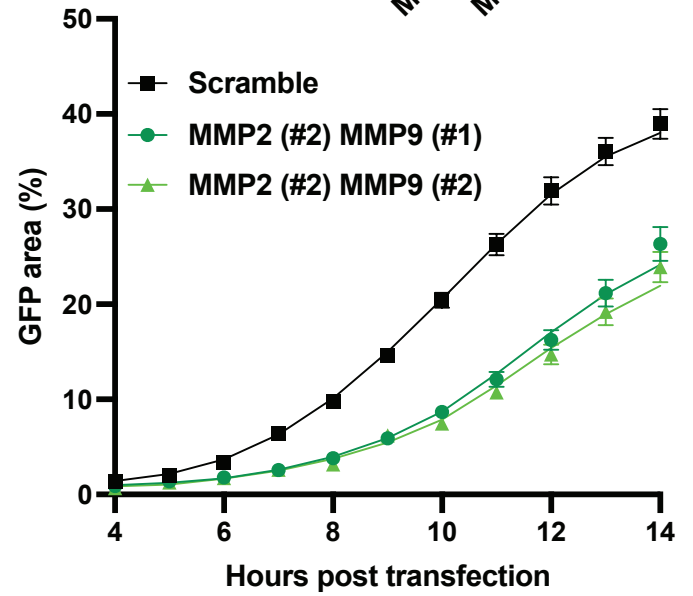

D

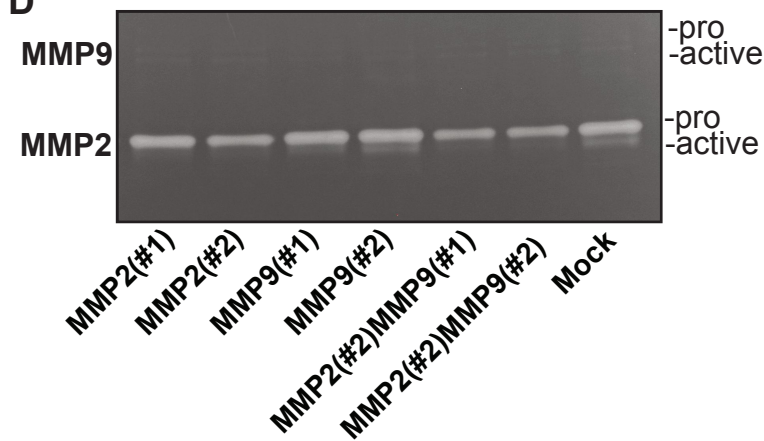

## Figure 5

A

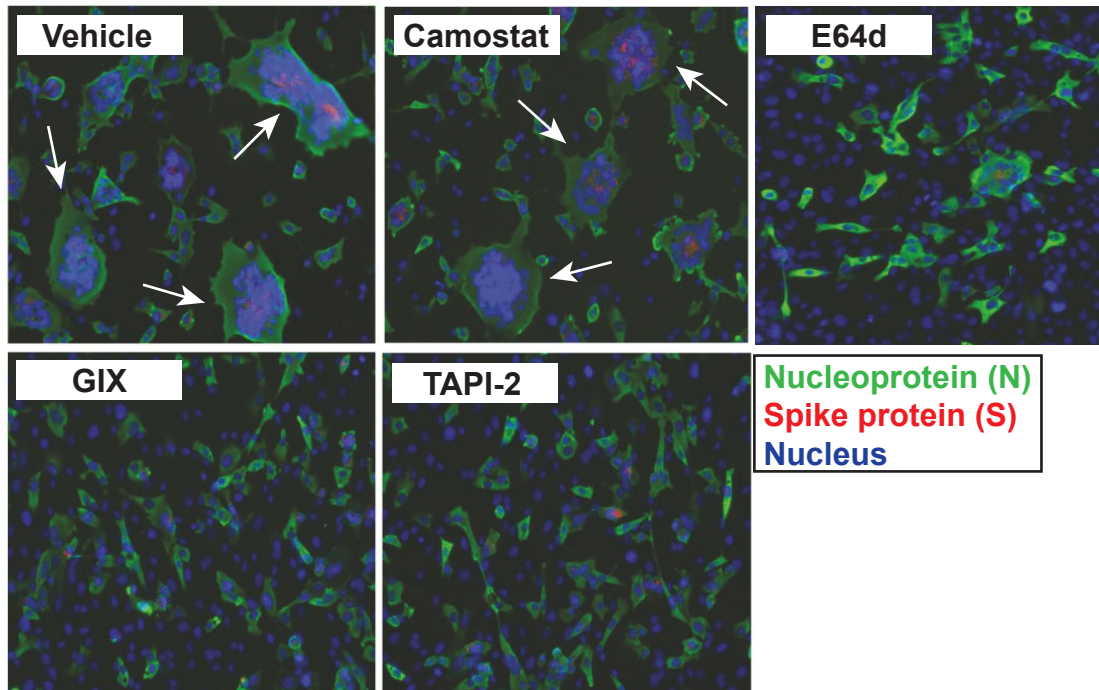

B

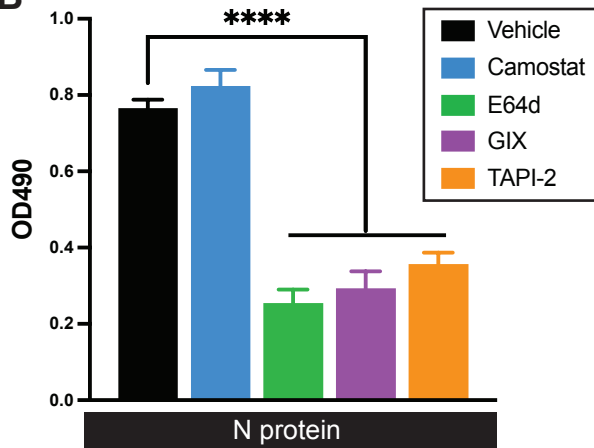

# Figure 6

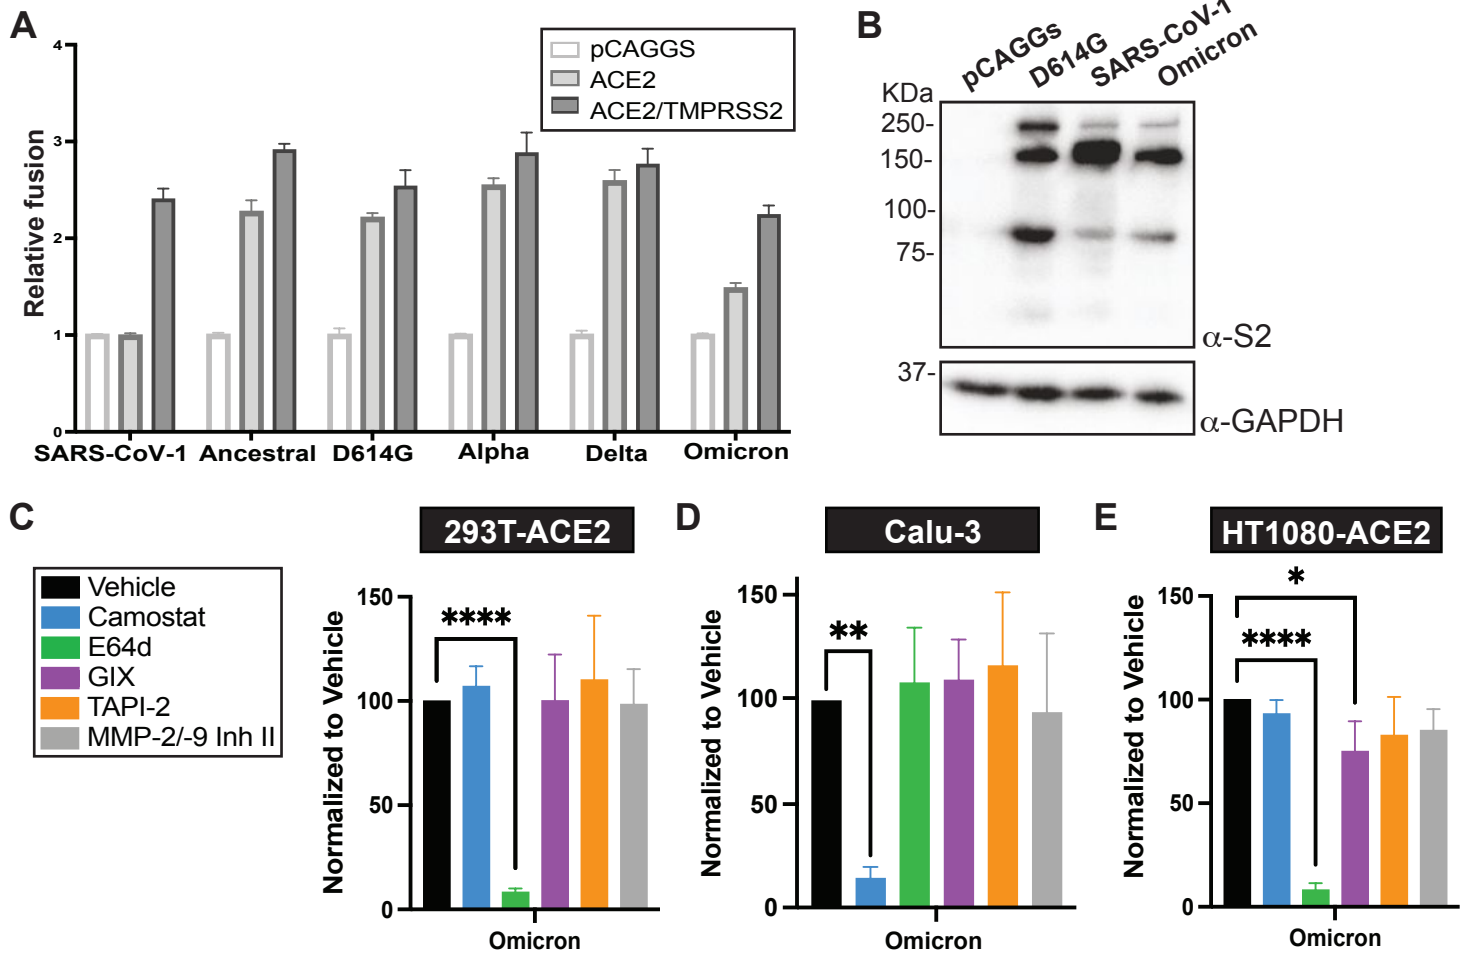



Figure S1

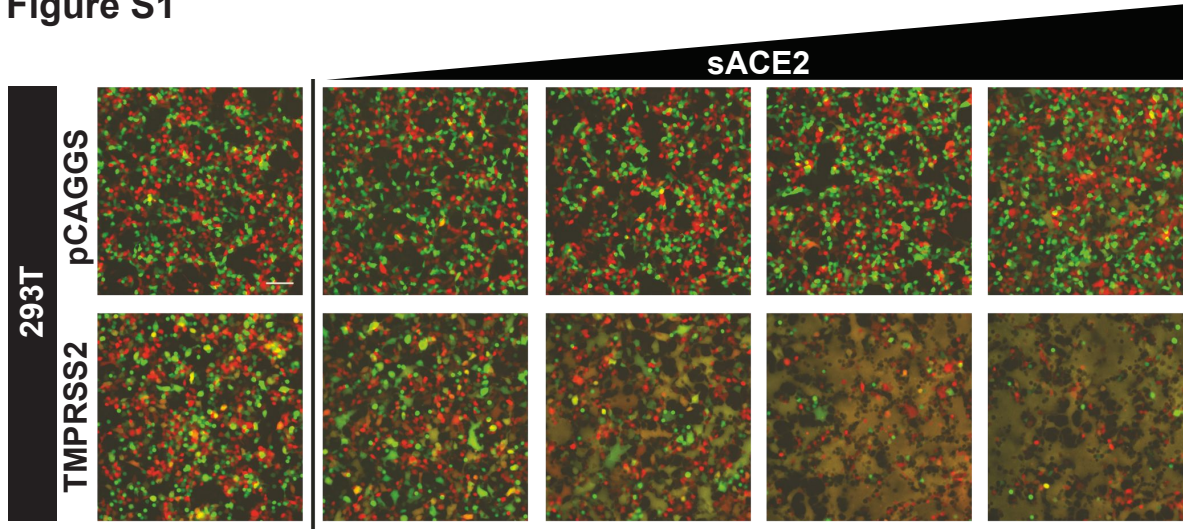

## Figure S2

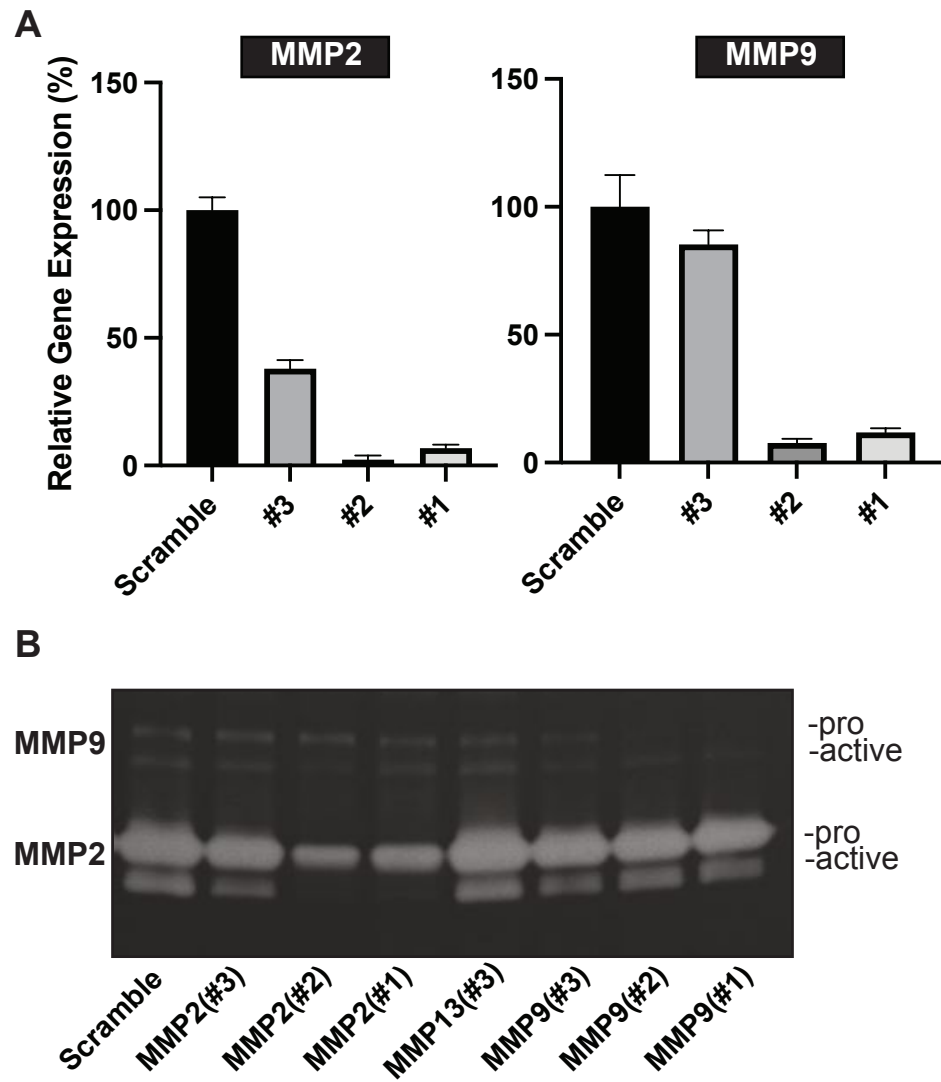

## Figure S3

A

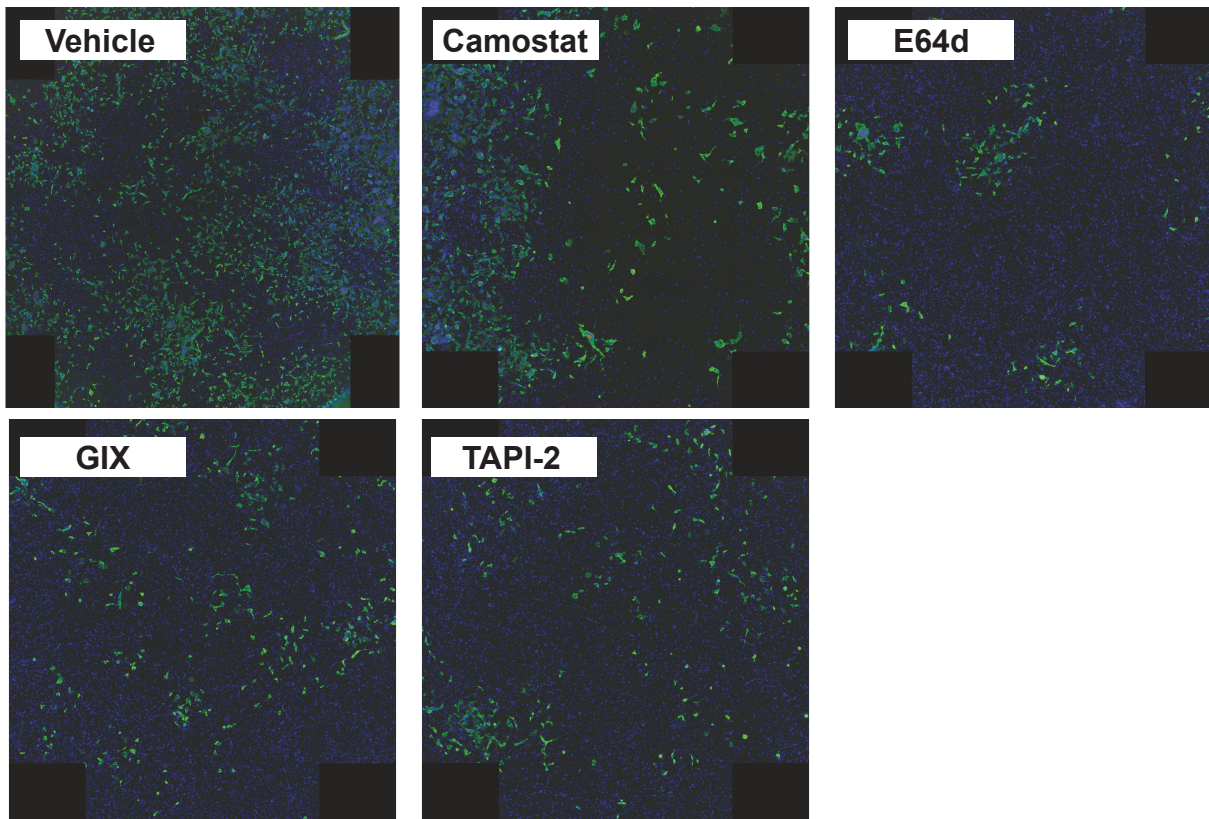

B

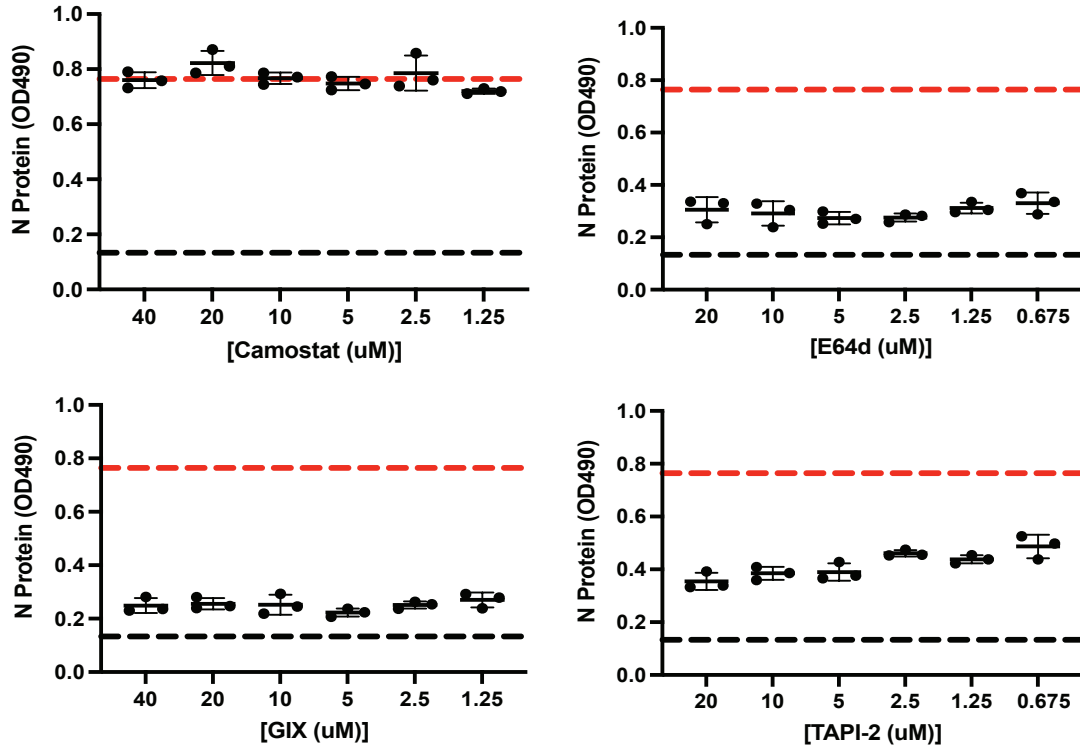

## Figure S4

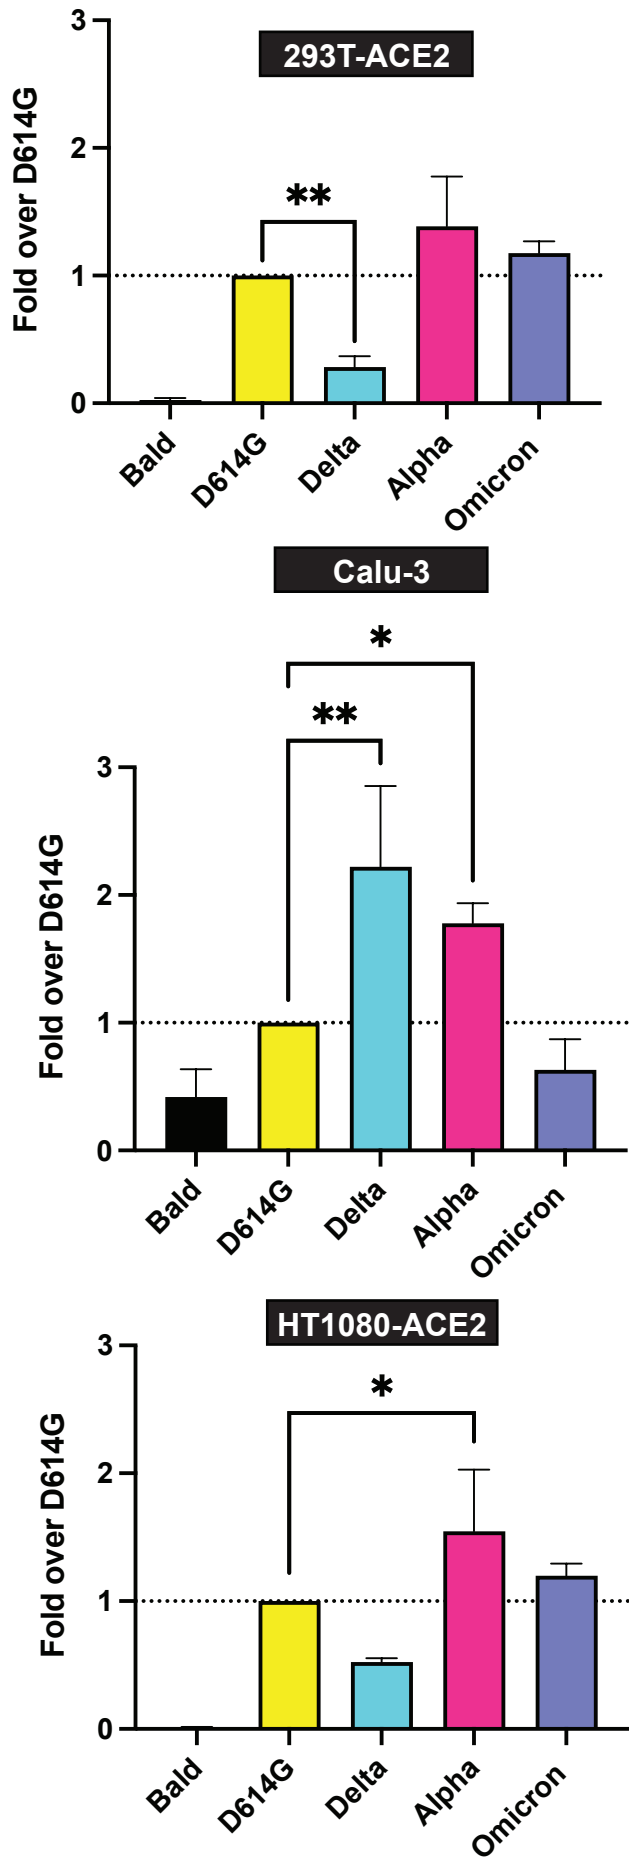

Source: https://www.biorxiv.org/content/10.1101/2022.02.19.481107v1.full.pdf
